# Supplementary material
Source: MDPI journal article supplement (https://www.mdpi.com/2304-6740/11/7/295)
Supplement: s1 [file s1]

# Supplementary Information

## Complexation of Boron and Aluminum with a Bidentate Hydroxy-BN-naphthalene Ligand

Yannik Appiarius <sup>1,2</sup>, Pim Puylaert <sup>3</sup>, Julius Werthschütz <sup>4</sup>, Tim Neudecker <sup>2,4,5</sup> and Anne Staubitz <sup>1,2,\*</sup>

<sup>1</sup> University of Bremen, Institute for Organic and Analytical Chemistry, 28359 Bremen, Germany; yappiarius@uni-bremen.de

<sup>2</sup> University of Bremen, MAPEX Center for Materials and Processes, 28359 Bremen, Germany; neudecker@uni-bremen.de

<sup>3</sup> University of Bremen, Institute for Inorganic Chemistry and Crystallography, 28359 Bremen, Germany; puylaert@uni-bremen.de

<sup>4</sup> University of Bremen, Institute for Physical and Theoretical Chemistry, 28359 Bremen, Germany; jwerthsc@uni-bremen.de

<sup>5</sup> University of Bremen, Bremen Center for Computational Materials Science, 28359 Bremen, Germany

\* Correspondence: staubitz@uni-bremen.de

**Abstract:** The isoelectronic relationship of 1,2-azaborinine (B=N structural motif) and benzene (C=C) is well documented. Upon deprotonation of the former, the anionic 1,2-azaboratabenzene is obtained, which is isosteric with pyridine (C=N) and has a similar capability as an aromatic *N*-donor. We present the complexation of boron and aluminum precursors with a  $\kappa^2$ -*N,O*-donating 8-hydroxy-BN-naphthalene ligand (**H<sub>2</sub>(BQ)**, **1**). Six chelate complexes with 1:1 and 2:1 stoichiometries were isolated and characterized by X-ray diffraction analysis and NMR spectroscopy. Comparing the isosteric dimethylaluminum complexes of **H<sub>2</sub>(BQ)** and an 8-hydroxyquinoline (**HQ'**, **2**) as reference allowed us to quantify the influence of such a formal substitution of carbon by boron on the structure and the electronic properties: While the structural parameters of the ligands were similar, the electropositive boron atom affected the electron density distributions within the complexes substantially. As the consequence, the Al–N bond was significantly shortened and the aluminum atom showed a different coordination geometry than in the quinoline analog. Moreover, strong hypsochromic shifts of both the absorption and the emission were observed. The results highlight that the differences between CN and BN polyaromatic complexes are more distinct than between equally charged BN and CC congeners.

## Table of Contents

|       |                                                                  |    |
|-------|------------------------------------------------------------------|----|
| 1.    | Investigation of the Hydrolytic Stabilities .....                | 3  |
| 2.    | Crystallography .....                                            | 4  |
| 3.    | NMR Spectra .....                                                | 9  |
| 3.1.  | 2-Methoxy-6-vinylaniline (6) .....                               | 9  |
| 3.2.  | 8-Methoxy-2-methyl-1,2-dihydro-1-aza-2-boranaphthalene (7) ..... | 10 |
| 3.3.  | 8-Hydroxy-2-methyl-1,2-dihydro-1-aza-2-boranaphthalene (1) ..... | 11 |
| 3.4.  | <b>Li[Et<sub>2</sub>B(BQ)] (9)</b> .....                         | 13 |
| 3.5.  | <b>Li[Ph<sub>2</sub>B(BQ)] (10)</b> .....                        | 14 |
| 3.6.  | <b>Na[B(BQ)<sub>2</sub>] (11)</b> .....                          | 16 |
| 3.7.  | <b>Li[Me<sub>2</sub>Al(BQ)] (4)</b> .....                        | 17 |
| 3.8.  | <b>Li[Ph<sub>2</sub>Al(BQ)] (12)</b> .....                       | 19 |
| 3.9.  | <b>Li[Al(BQ)<sub>2</sub>] (13)</b> .....                         | 20 |
| 3.10. | <b>[Me<sub>2</sub>Al(Q')]<sub>2</sub> (3)</b> .....              | 22 |
| 4.    | Optical Spectroscopy .....                                       | 23 |
| 5.    | Calculations .....                                               | 24 |
| 6.    | References .....                                                 | 26 |

## 1. Investigation of the Hydrolytic Stabilities

The hydrolytic stability of  $\text{Li}[\text{Me}_2\text{Al}(\text{BQ})]$  (**4**) and  $[\text{Me}_2\text{Al}(\text{BQ})]_2$  (**3**) was investigated by NMR and IR spectroscopy as well as mass spectrometry. Using dry THF-*d*<sub>8</sub> or benzene-*d*<sub>6</sub> as solvents, we did not observe decomposition products of **4** in the respective  $^1\text{H}$  NMR spectra. Moreover, crystalline samples could be stored in a glove box for an infinite time without signs of degradation. Also, the  $[\text{Me}_2\text{Al}(\text{BQ})]^-$  anion was detected as the only species by electrospray ionization mass spectrometry (ESI-MS). However, the addition of 1% water in non-dried THF (0.1 mL) both induced the reprotonation of the azaborinine nitrogen atom and the cleavage of the Al-CH<sub>3</sub> bonds. In fact, the subsequent crystallization from *n*-hexane revealed that the complex of the NH-protonated ligand with aluminum via the phenolate  $[\text{Al}(\text{H}(\text{BQ}))_3(\text{THF})]_2$  was formed (Figure S1). Such solid-state molecular structure involving a pentacoordinate aluminum has been reported for a similar complex of phenol and aluminum.[1] An IR spectrum and the melting point could not be obtained, as rapid hydrolysis was found under the conditions in our laboratories.

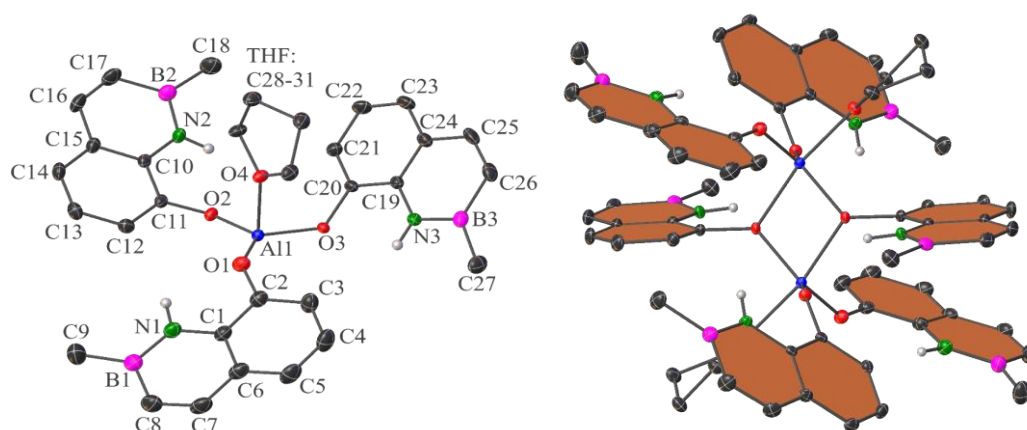

**Figure S1.** Molecular structure of the monomeric unit and the dimer of  $[\text{Al}(\text{H}(\text{BQ}))_3(\text{THF})]_2$ .

In contrast, solid samples of **3** were prone to hydrolysis, so that O-H stretching vibrations were absent in the IR spectrum, and a thermal stability up to 210 °C was observed. Moreover, it was possible to record a high-resolution mass spectrum of this compound, showing  $[\text{MeAl}(\text{Q}')^+]$  as the fragment with the highest relative intensity. However, a strongly donating solvent such as THF induced a decomposition, presumably by coordinating to the aluminum atom and breaking the trigonal-bipyramidal coordination.

## 2. Crystallography

**Table S1:** Crystal Data and Structure Refinements.

|                                             |                                                                                              |
|---------------------------------------------|----------------------------------------------------------------------------------------------|
| Complex                                     | <b>[(Li(THF)<sub>2</sub>(diox)<sub>0.5</sub>][Et<sub>2</sub>B(BQ)])<sub>2</sub></b>          |
| CCDC                                        | 2259514                                                                                      |
| Empirical formula                           | C <sub>46</sub> H <sub>76</sub> B <sub>4</sub> Li <sub>2</sub> N <sub>2</sub> O <sub>8</sub> |
| Formula weight                              | 842.20                                                                                       |
| Temperature/K                               | 100.00                                                                                       |
| Crystal system                              | monoclinic                                                                                   |
| Space group                                 | P2 <sub>1</sub> /c                                                                           |
| a/Å                                         | 9.796(3)                                                                                     |
| b/Å                                         | 14.727(4)                                                                                    |
| c/Å                                         | 17.458(4)                                                                                    |
| α/°                                         | 90                                                                                           |
| β/°                                         | 103.832(12)                                                                                  |
| γ/°                                         | 90                                                                                           |
| Volume/Å <sup>3</sup>                       | 2445.6(12)                                                                                   |
| Z                                           | 2                                                                                            |
| Q <sub>calc</sub> /g/cm <sup>3</sup>        | 1.144                                                                                        |
| μ/mm <sup>-1</sup>                          | 0.074                                                                                        |
| F(000)                                      | 912.0                                                                                        |
| Crystal size/mm <sup>3</sup>                | 0.1 × 0.08 × 0.05                                                                            |
| Radiation                                   | MoKα (λ = 0.71073)                                                                           |
| 2θ range for data collection/°              | 4.806 to 51.36                                                                               |
| Index ranges                                | -9 ≤ h ≤ 11, -17 ≤ k ≤ 17, -21 ≤ l ≤ 21                                                      |
| Reflections collected                       | 10969                                                                                        |
| Independent reflections                     | 4594 [R <sub>int</sub> = 0.0880, R <sub>sigma</sub> = 0.1200]                                |
| Data/restraints/parameters                  | 4594/0/283                                                                                   |
| Goodness-of-fit on F <sup>2</sup>           | 1.012                                                                                        |
| Final R indexes [I ≥ 2σ (I)]                | R <sub>1</sub> = 0.0770, wR <sub>2</sub> = 0.1986                                            |
| Final R indexes [all data]                  | R <sub>1</sub> = 0.1120, wR <sub>2</sub> = 0.2302                                            |
| Largest diff. peak/hole / e Å <sup>-3</sup> | 0.41/-0.52                                                                                   |

|                                      |                                                                  |
|--------------------------------------|------------------------------------------------------------------|
| Complex                              | <b>[Li(THF)<sub>3</sub>][Ph<sub>2</sub>B(BQ)]</b>                |
| CCDC                                 | 2259522                                                          |
| Empirical formula                    | C <sub>33</sub> H <sub>42</sub> B <sub>2</sub> LiNO <sub>4</sub> |
| Formula weight                       | 545.23                                                           |
| Temperature/K                        | 100.00                                                           |
| Crystal system                       | monoclinic                                                       |
| Space group                          | P2 <sub>1</sub> /c                                               |
| a/Å                                  | 17.6018(8)                                                       |
| b/Å                                  | 20.7780(12)                                                      |
| c/Å                                  | 16.8289(9)                                                       |
| α/°                                  | 90                                                               |
| β/°                                  | 90.789(2)                                                        |
| γ/°                                  | 90                                                               |
| Volume/Å <sup>3</sup>                | 6154.3(6)                                                        |
| Z                                    | 8                                                                |
| Q <sub>calc</sub> /g/cm <sup>3</sup> | 1.177                                                            |
| μ/mm <sup>-1</sup>                   | 0.074                                                            |
| F(000)                               | 2336.0                                                           |
| Crystal size/mm <sup>3</sup>         | 0.42 × 0.18 × 0.15                                               |
| Radiation                            | MoKα (λ = 0.71073)                                               |
| 2θ range for data collection/°       | 3.86 to 56.646                                                   |

|                                                |                                                                |
|------------------------------------------------|----------------------------------------------------------------|
| Index ranges                                   | $-22 \leq h \leq 23, -27 \leq k \leq 27, -22 \leq l \leq 22$   |
| Reflections collected                          | 338940                                                         |
| Independent reflections                        | 15347 [ $R_{\text{int}} = 0.0825, R_{\text{sigma}} = 0.0261$ ] |
| Data/restraints/parameters                     | 15347/0/935                                                    |
| Goodness-of-fit on $F^2$                       | 1.068                                                          |
| Final R indexes [ $I \geq 2\sigma(I)$ ]        | $R_1 = 0.0646, wR_2 = 0.1533$                                  |
| Final R indexes [all data]                     | $R_1 = 0.0757, wR_2 = 0.1619$                                  |
| Largest diff. peak/hole / $e \text{ \AA}^{-3}$ | 0.72/-0.38                                                     |

|                                                |                                                                          |
|------------------------------------------------|--------------------------------------------------------------------------|
| Complex                                        | <b><math>[(\text{Na}(\text{THF})_2)[\text{B}(\text{BQ})_2])_2</math></b> |
| CCDC                                           | 2259516                                                                  |
| Empirical formula                              | $\text{C}_{26}\text{H}_{32}\text{B}_3\text{N}_2\text{NaO}_4$             |
| Formula weight                                 | 491.95                                                                   |
| Temperature/K                                  | 119.99                                                                   |
| Crystal system                                 | triclinic                                                                |
| Space group                                    | P-1                                                                      |
| $a/\text{\AA}$                                 | 11.1607(19)                                                              |
| $b/\text{\AA}$                                 | 11.892(2)                                                                |
| $c/\text{\AA}$                                 | 12.316(2)                                                                |
| $\alpha/^\circ$                                | 117.706(6)                                                               |
| $\beta/^\circ$                                 | 92.755(6)                                                                |
| $\gamma/^\circ$                                | 110.342(6)                                                               |
| Volume/ $\text{\AA}^3$                         | 1313.0(4)                                                                |
| Z                                              | 2                                                                        |
| $\rho_{\text{calc}}/\text{g cm}^{-3}$          | 1.244                                                                    |
| $\mu/\text{mm}^{-1}$                           | 0.095                                                                    |
| $F(000)$                                       | 520.0                                                                    |
| Crystal size/ $\text{mm}^3$                    | $0.6 \times 0.3 \times 0.1$                                              |
| Radiation                                      | $\text{MoK}\alpha$ ( $\lambda = 0.71073$ )                               |
| $2\theta$ range for data collection/ $^\circ$  | 4.822 to 56.712                                                          |
| Index ranges                                   | $-13 \leq h \leq 14, -15 \leq k \leq 15, -16 \leq l \leq 16$             |
| Reflections collected                          | 36401                                                                    |
| Independent reflections                        | 6557 [ $R_{\text{int}} = 0.0508, R_{\text{sigma}} = 0.0353$ ]            |
| Data/restraints/parameters                     | 6557/0/327                                                               |
| Goodness-of-fit on $F^2$                       | 1.031                                                                    |
| Final R indexes [ $I \geq 2\sigma(I)$ ]        | $R_1 = 0.0503, wR_2 = 0.1180$                                            |
| Final R indexes [all data]                     | $R_1 = 0.0690, wR_2 = 0.1288$                                            |
| Largest diff. peak/hole / $e \text{ \AA}^{-3}$ | 0.53/-0.39                                                               |

|                                       |                                                                                |
|---------------------------------------|--------------------------------------------------------------------------------|
| Complex                               | <b><math>[\text{Li}(\text{THF})_3][\text{Me}_2\text{Al}(\text{BQ})]</math></b> |
| CCDC                                  | 2259515                                                                        |
| Empirical formula                     | $\text{C}_{23}\text{H}_{38}\text{AlBLiNO}_4$                                   |
| Formula weight                        | 437.27                                                                         |
| Temperature/K                         | 100.00                                                                         |
| Crystal system                        | monoclinic                                                                     |
| Space group                           | Cc                                                                             |
| $a/\text{\AA}$                        | 17.801(3)                                                                      |
| $b/\text{\AA}$                        | 8.5125(13)                                                                     |
| $c/\text{\AA}$                        | 18.438(4)                                                                      |
| $\alpha/^\circ$                       | 90                                                                             |
| $\beta/^\circ$                        | 114.105(13)                                                                    |
| $\gamma/^\circ$                       | 90                                                                             |
| Volume/ $\text{\AA}^3$                | 2550.4(8)                                                                      |
| Z                                     | 4                                                                              |
| $\rho_{\text{calc}}/\text{g cm}^{-3}$ | 1.139                                                                          |

|                                                |                                                               |
|------------------------------------------------|---------------------------------------------------------------|
| $\mu/\text{mm}^{-1}$                           | 0.106                                                         |
| F(000)                                         | 944.0                                                         |
| Crystal size/ $\text{mm}^3$                    | $0.3 \times 0.2 \times 0.15$                                  |
| Radiation                                      | MoK $\alpha$ ( $\lambda = 0.71073$ )                          |
| 2 $\Theta$ range for data collection/ $^\circ$ | 4.84 to 61.138                                                |
| Index ranges                                   | $-25 \leq h \leq 25, -12 \leq k \leq 12, -26 \leq l \leq 26$  |
| Reflections collected                          | 35381                                                         |
| Independent reflections                        | 7388 [ $R_{\text{int}} = 0.0504, R_{\text{sigma}} = 0.0436$ ] |
| Data/restraints/parameters                     | 7388/2/432                                                    |
| Goodness-of-fit on $F^2$                       | 1.040                                                         |
| Final R indexes [ $I \geq 2\sigma(I)$ ]        | $R_1 = 0.0370, wR_2 = 0.0769$                                 |
| Final R indexes [all data]                     | $R_1 = 0.0487, wR_2 = 0.0811$                                 |
| Largest diff. peak/hole / $e \text{ \AA}^{-3}$ | 0.23/-0.22                                                    |

|                                                |                                                               |
|------------------------------------------------|---------------------------------------------------------------|
| Complex                                        | <b>[Li(THF)<sub>3</sub>][Ph<sub>2</sub>Al(BQ)]</b>            |
| CCDC                                           | 2259521                                                       |
| Empirical formula                              | C <sub>33</sub> H <sub>42</sub> AlBLiNO <sub>4</sub>          |
| Formula weight                                 | 561.40                                                        |
| Temperature/K                                  | 100.00                                                        |
| Crystal system                                 | orthorhombic                                                  |
| Space group                                    | Pca2 <sub>1</sub>                                             |
| a/ $\text{\AA}$                                | 17.6861(10)                                                   |
| b/ $\text{\AA}$                                | 9.5637(6)                                                     |
| c/ $\text{\AA}$                                | 18.7543(19)                                                   |
| $\alpha/^\circ$                                | 90                                                            |
| $\beta/^\circ$                                 | 90                                                            |
| $\gamma/^\circ$                                | 90                                                            |
| Volume/ $\text{\AA}^3$                         | 3172.2(4)                                                     |
| Z                                              | 4                                                             |
| $\rho_{\text{calc}}/\text{g/cm}^3$             | 1.176                                                         |
| $\mu/\text{mm}^{-1}$                           | 0.100                                                         |
| F(000)                                         | 1200.0                                                        |
| Crystal size/ $\text{mm}^3$                    | $0.14 \times 0.05 \times 0.02$                                |
| Radiation                                      | MoK $\alpha$ ( $\lambda = 0.71073$ )                          |
| 2 $\Theta$ range for data collection/ $^\circ$ | 4.606 to 61.08                                                |
| Index ranges                                   | $-25 \leq h \leq 22, -13 \leq k \leq 13, -26 \leq l \leq 26$  |
| Reflections collected                          | 69045                                                         |
| Independent reflections                        | 9687 [ $R_{\text{int}} = 0.0627, R_{\text{sigma}} = 0.0417$ ] |
| Data/restraints/parameters                     | 9687/1/371                                                    |
| Goodness-of-fit on $F^2$                       | 1.025                                                         |
| Final R indexes [ $I \geq 2\sigma(I)$ ]        | $R_1 = 0.0599, wR_2 = 0.1621$                                 |
| Final R indexes [all data]                     | $R_1 = 0.0760, wR_2 = 0.1761$                                 |
| Largest diff. peak/hole / $e \text{ \AA}^{-3}$ | 0.96/-0.43                                                    |

|                   |                                                                                  |
|-------------------|----------------------------------------------------------------------------------|
| Complex           | <b>[Li(THF)<sub>3</sub>][Al(BQ)<sub>2</sub>]</b>                                 |
| CCDC              | 2259518                                                                          |
| Empirical formula | C <sub>30</sub> H <sub>40</sub> AlB <sub>2</sub> LiN <sub>2</sub> O <sub>5</sub> |
| Formula weight    | 564.18                                                                           |
| Temperature/K     | 100.00                                                                           |
| Crystal system    | triclinic                                                                        |
| Space group       | P-1                                                                              |
| a/ $\text{\AA}$   | 10.070(3)                                                                        |
| b/ $\text{\AA}$   | 10.701(3)                                                                        |
| c/ $\text{\AA}$   | 15.809(5)                                                                        |
| $\alpha/^\circ$   | 85.336(11)                                                                       |

|                                                |                                                               |
|------------------------------------------------|---------------------------------------------------------------|
| $\beta/^\circ$                                 | 81.473(12)                                                    |
| $\gamma/^\circ$                                | 64.072(9)                                                     |
| Volume/ $\text{\AA}^3$                         | 1515.0(8)                                                     |
| Z                                              | 2                                                             |
| $\rho_{\text{calc}}/\text{g cm}^{-3}$          | 1.237                                                         |
| $\mu/\text{mm}^{-1}$                           | 0.108                                                         |
| F(000)                                         | 600.0                                                         |
| Crystal size/ $\text{mm}^3$                    | $0.56 \times 0.2 \times 0.04$                                 |
| Radiation                                      | MoK $\alpha$ ( $\lambda = 0.71073$ )                          |
| 2 $\Theta$ range for data collection/ $^\circ$ | 4.232 to 56.706                                               |
| Index ranges                                   | $-12 \leq h \leq 13, -14 \leq k \leq 14, -21 \leq l \leq 21$  |
| Reflections collected                          | 29381                                                         |
| Independent reflections                        | 7543 [ $R_{\text{int}} = 0.0730, R_{\text{sigma}} = 0.0675$ ] |
| Data/restraints/parameters                     | 7543/0/372                                                    |
| Goodness-of-fit on $F^2$                       | 1.048                                                         |
| Final R indexes [ $I \geq 2\sigma(I)$ ]        | $R_1 = 0.0559, wR_2 = 0.1095$                                 |
| Final R indexes [all data]                     | $R_1 = 0.0918, wR_2 = 0.1236$                                 |
| Largest diff. peak/hole / $e \text{\AA}^{-3}$  | 0.37/-0.32                                                    |

|                                                |                                                               |
|------------------------------------------------|---------------------------------------------------------------|
| Complex                                        | <b>[Me<sub>2</sub>Al(Q')]</b>                                 |
| CCDC                                           | 2259520                                                       |
| Empirical formula                              | C <sub>12</sub> H <sub>14</sub> AlNO                          |
| Formula weight                                 | 215.22                                                        |
| Temperature/K                                  | 100.00                                                        |
| Crystal system                                 | triclinic                                                     |
| Space group                                    | P-1                                                           |
| a/ $\text{\AA}$                                | 9.537(3)                                                      |
| b/ $\text{\AA}$                                | 9.792(2)                                                      |
| c/ $\text{\AA}$                                | 12.638(3)                                                     |
| $\alpha/^\circ$                                | 88.302(9)                                                     |
| $\beta/^\circ$                                 | 73.190(10)                                                    |
| $\gamma/^\circ$                                | 81.824(9)                                                     |
| Volume/ $\text{\AA}^3$                         | 1118.1(5)                                                     |
| Z                                              | 4                                                             |
| $\rho_{\text{calc}}/\text{g cm}^{-3}$          | 1.279                                                         |
| $\mu/\text{mm}^{-1}$                           | 0.153                                                         |
| F(000)                                         | 456.0                                                         |
| Crystal size/ $\text{mm}^3$                    | $0.223 \times 0.161 \times 0.12$                              |
| Radiation                                      | MoK $\alpha$ ( $\lambda = 0.71073$ )                          |
| 2 $\Theta$ range for data collection/ $^\circ$ | 5.718 to 61.088                                               |
| Index ranges                                   | $-13 \leq h \leq 13, -13 \leq k \leq 13, -18 \leq l \leq 18$  |
| Reflections collected                          | 71748                                                         |
| Independent reflections                        | 6824 [ $R_{\text{int}} = 0.0508, R_{\text{sigma}} = 0.0272$ ] |
| Data/restraints/parameters                     | 6824/0/277                                                    |
| Goodness-of-fit on $F^2$                       | 1.034                                                         |
| Final R indexes [ $I \geq 2\sigma(I)$ ]        | $R_1 = 0.0353, wR_2 = 0.1045$                                 |
| Final R indexes [all data]                     | $R_1 = 0.0381, wR_2 = 0.1076$                                 |
| Largest diff. peak/hole / $e \text{\AA}^{-3}$  | 0.50/-0.34                                                    |

|                   |                                                                                              |
|-------------------|----------------------------------------------------------------------------------------------|
| Complex           | <b>[Al(H(BQ))<sub>3</sub>](THF)<sub>2</sub></b>                                              |
| CCDC              | 2259519                                                                                      |
| Empirical formula | C <sub>62</sub> H <sub>70</sub> Al <sub>2</sub> B <sub>6</sub> N <sub>6</sub> O <sub>8</sub> |
| Formula weight    | 1146.06                                                                                      |
| Temperature/K     | 119.99                                                                                       |
| Crystal system    | triclinic                                                                                    |

|                                                |                                                                |
|------------------------------------------------|----------------------------------------------------------------|
| Space group                                    | P-1                                                            |
| a/Å                                            | 11.3152(7)                                                     |
| b/Å                                            | 11.7091(6)                                                     |
| c/Å                                            | 13.0761(8)                                                     |
| $\alpha/^\circ$                                | 95.048(2)                                                      |
| $\beta/^\circ$                                 | 113.613(2)                                                     |
| $\gamma/^\circ$                                | 105.874(2)                                                     |
| Volume/Å <sup>3</sup>                          | 1488.02(15)                                                    |
| Z                                              | 1                                                              |
| $\rho_{\text{calc}}/\text{g}/\text{cm}^3$      | 1.279                                                          |
| $\mu/\text{mm}^{-1}$                           | 0.110                                                          |
| F(000)                                         | 604.0                                                          |
| Crystal size/mm <sup>3</sup>                   | 0.4 × 0.3 × 0.2                                                |
| Radiation                                      | MoK $\alpha$ ( $\lambda$ = 0.71073)                            |
| 2 $\Theta$ range for data collection/ $^\circ$ | 5.078 to 58.258                                                |
| Index ranges                                   | -15 ≤ h ≤ 15, -16 ≤ k ≤ 12, -17 ≤ l ≤ 17                       |
| Reflections collected                          | 44252                                                          |
| Independent reflections                        | 7986 [ $R_{\text{int}}$ = 0.0364, $R_{\text{sigma}}$ = 0.0265] |
| Data/restraints/parameters                     | 7986/0/394                                                     |
| Goodness-of-fit on $F^2$                       | 1.026                                                          |
| Final R indexes [ $I \geq 2\sigma(I)$ ]        | $R_1$ = 0.0435, $wR_2$ = 0.1112                                |
| Final R indexes [all data]                     | $R_1$ = 0.0556, $wR_2$ = 0.1185                                |
| Largest diff. peak/hole / e Å <sup>-3</sup>    | 0.45/-0.33                                                     |



### 3. NMR Spectra

#### 3.1. 2-Methoxy-6-vinylaniline (6)

$^1\text{H}$  NMR (601 MHz,  $\text{CDCl}_3$ )

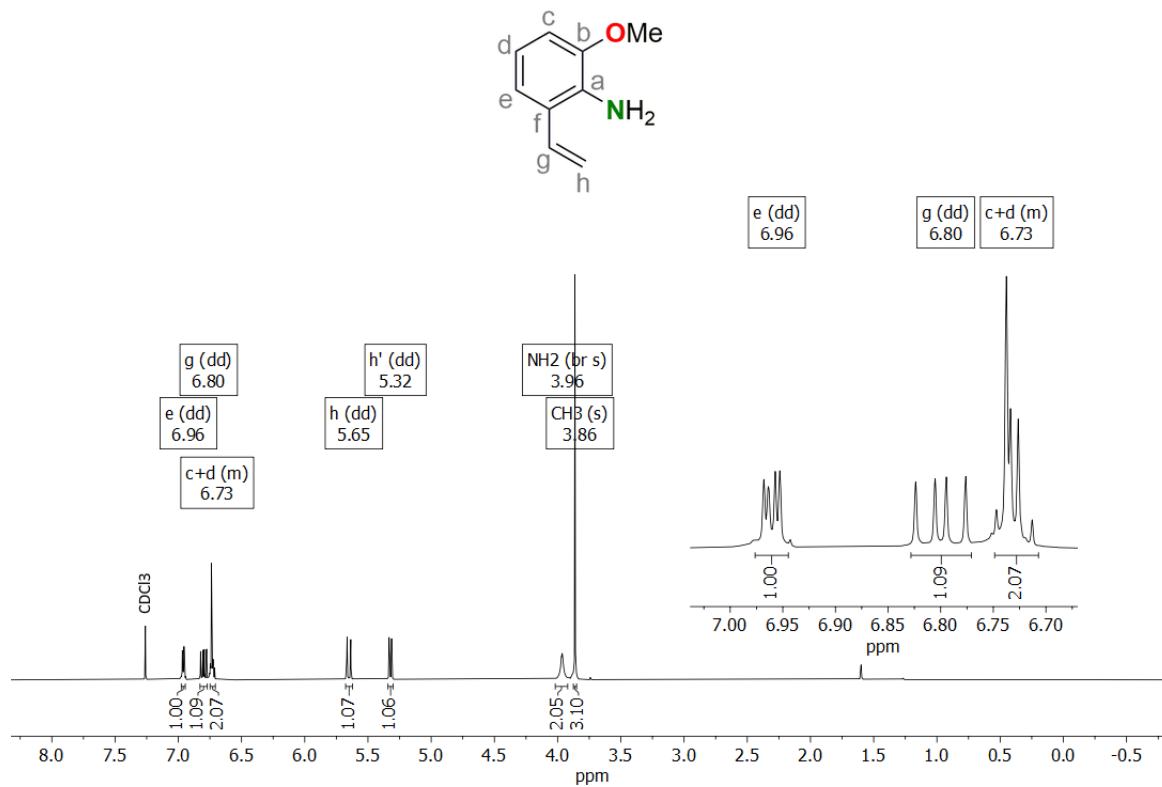

$^{13}\text{C}\{^1\text{H}\}$  NMR (151 MHz,  $\text{CDCl}_3$ )

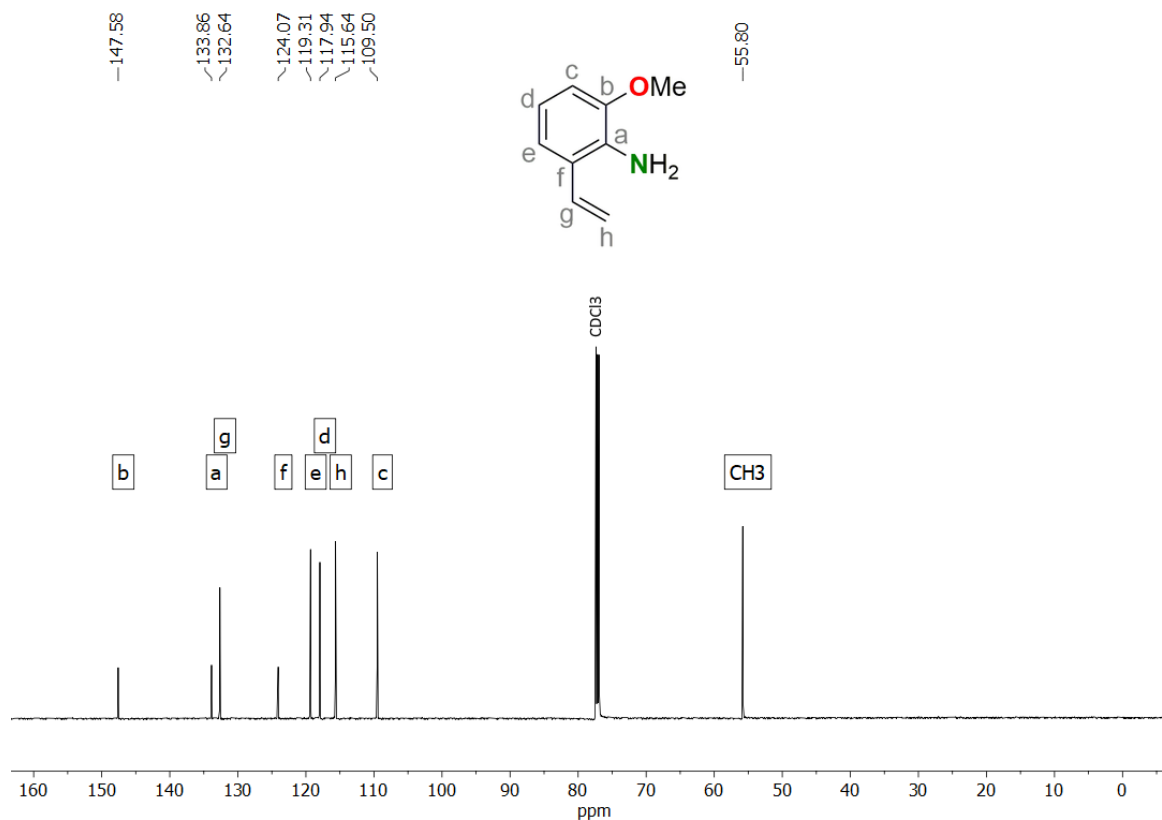

### 3.2. 8-Methoxy-2-methyl-1,2-dihydro-1-aza-2-boranaphthalene (7)

$^1\text{H}$  NMR (601 MHz,  $\text{CDCl}_3$ )

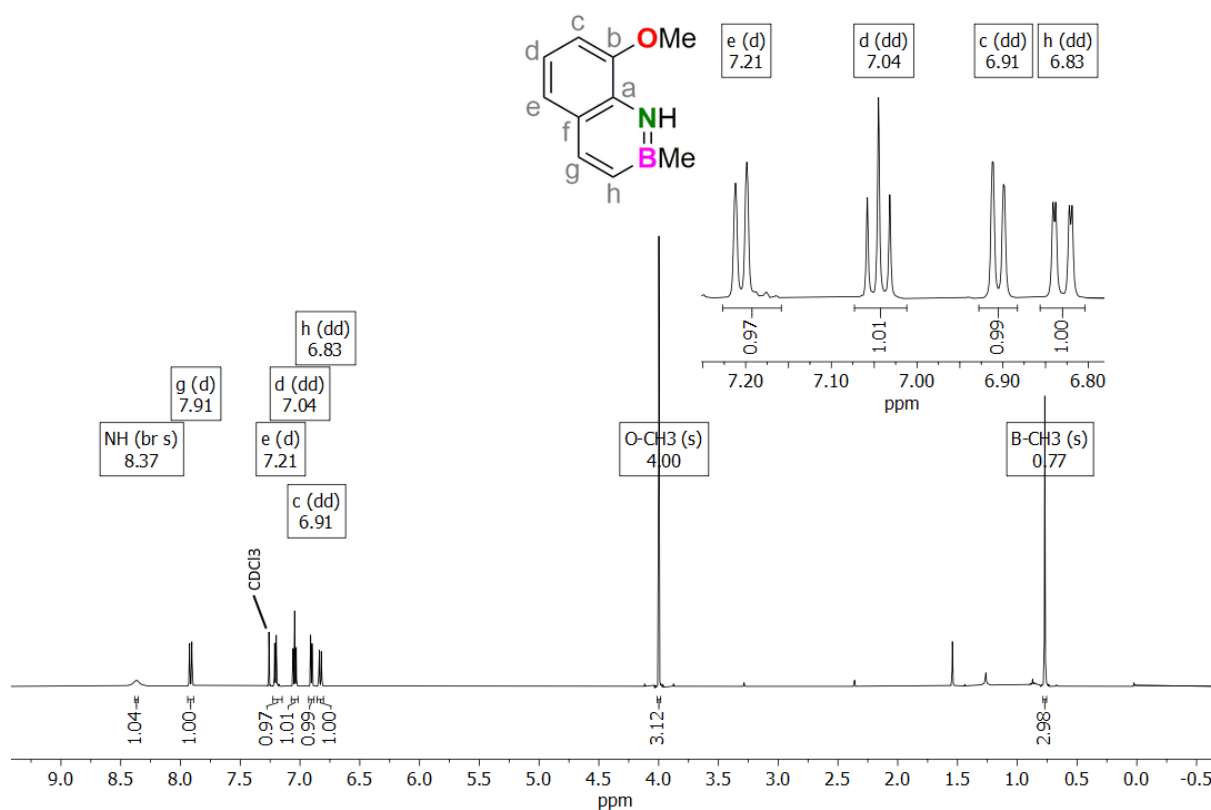

$^{13}\text{C}\{^1\text{H}\}$  NMR (151 MHz,  $\text{CDCl}_3$ )

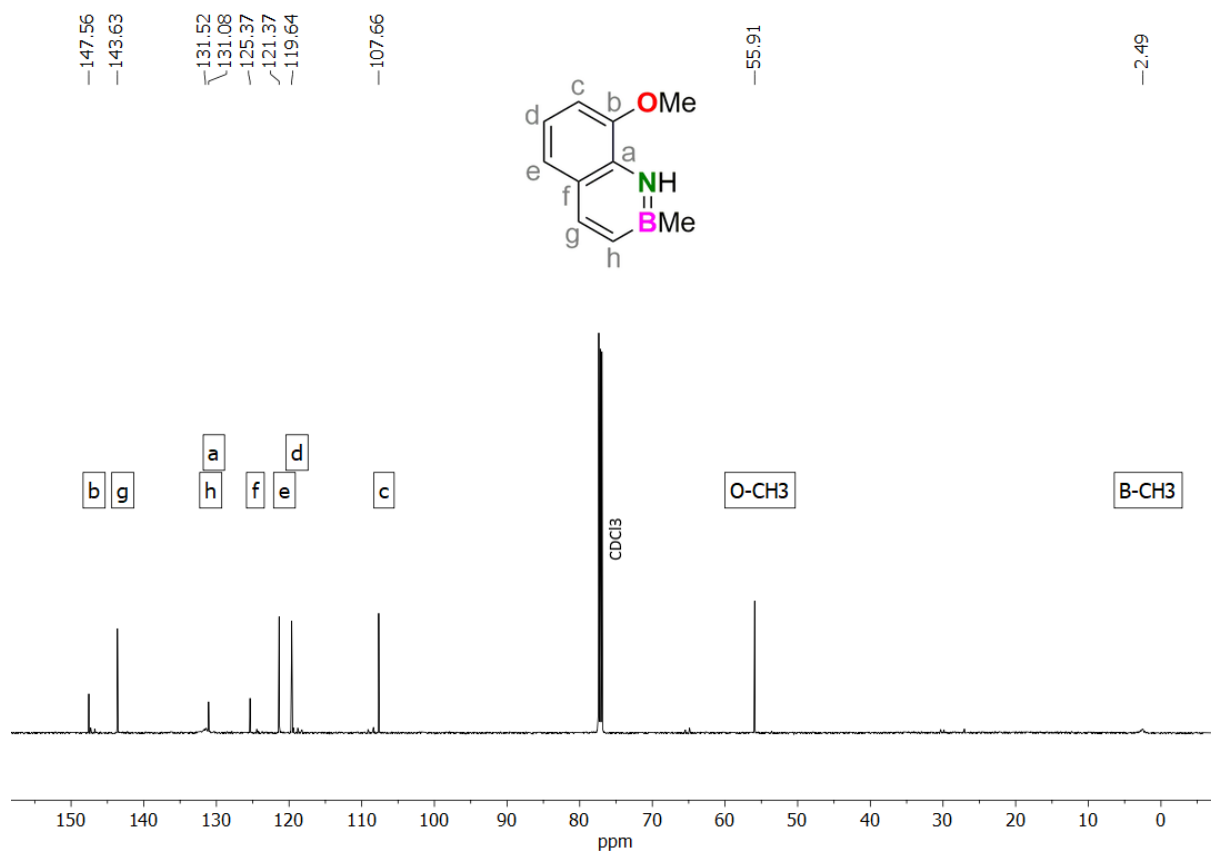

$^{11}\text{B}\{^1\text{H}\}$  NMR (193 MHz,  $\text{CDCl}_3$ )

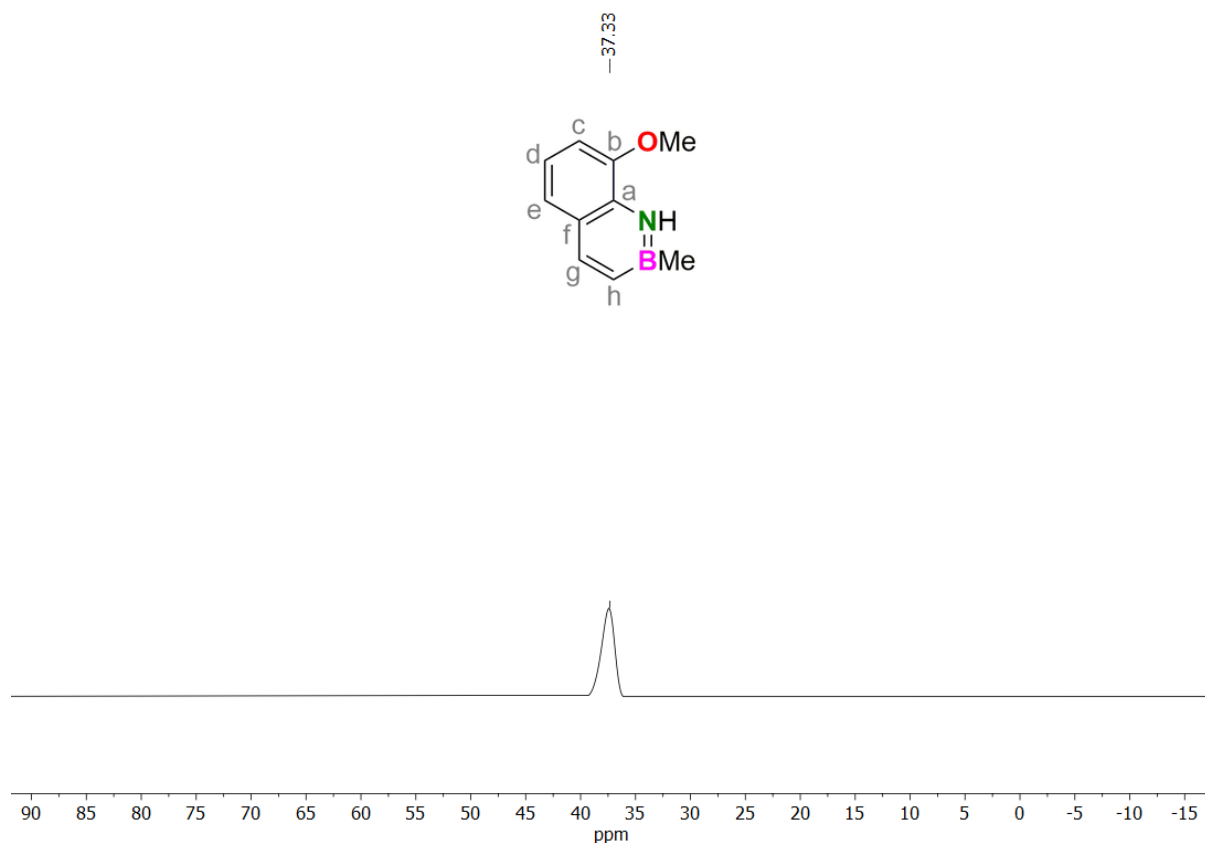

### 3.3. 8-Hydroxy-2-methyl-1,2-dihydro-1-aza-2-boranaphthalene (1)

$^1\text{H}$  NMR (601 MHz,  $\text{THF-d}_8$ )

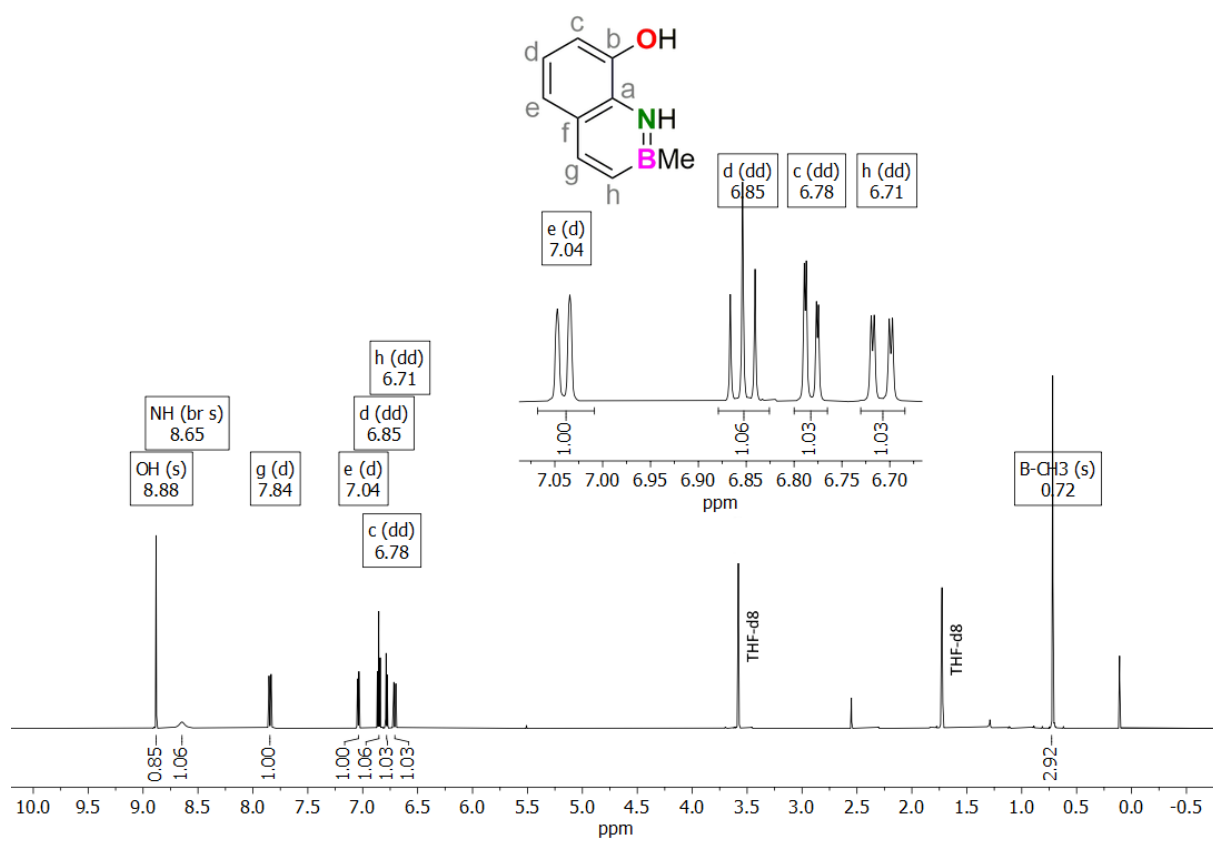

$^{13}\text{C}\{^1\text{H}\}$  NMR (151 MHz, THF- $d_8$ )

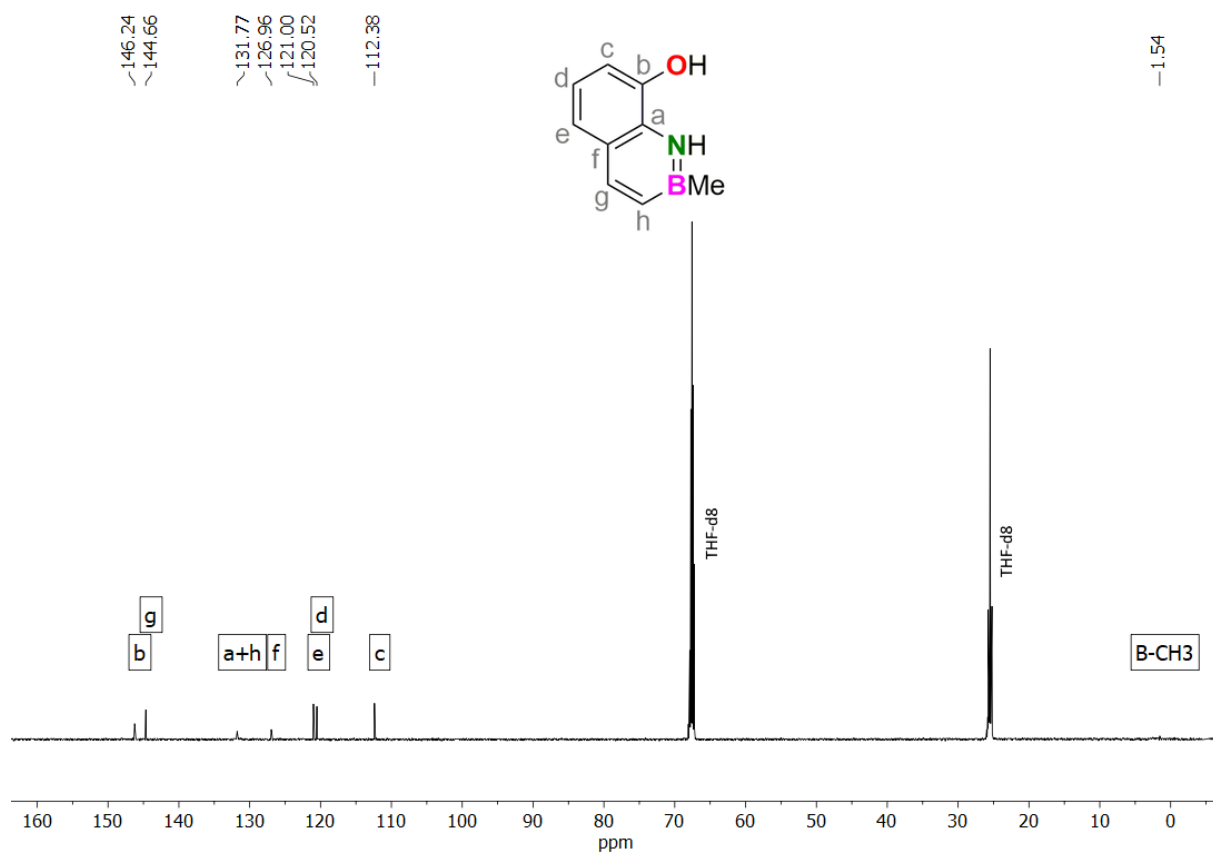

$^{11}\text{B}\{^1\text{H}\}$  NMR (193 MHz, THF- $d_8$ )

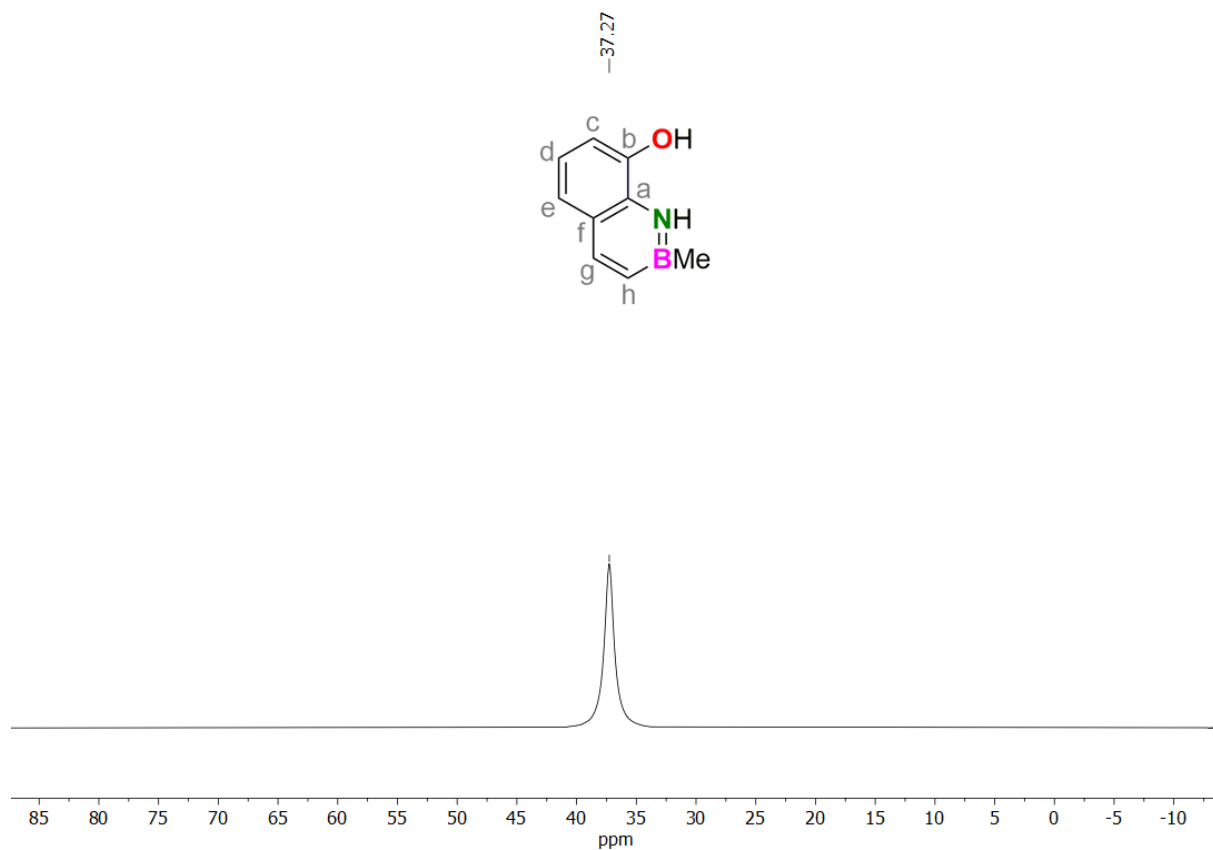

### 3.4. Li[Et<sub>2</sub>B(BQ)] (9)

<sup>1</sup>H NMR (601 MHz, THF-d<sub>8</sub>)

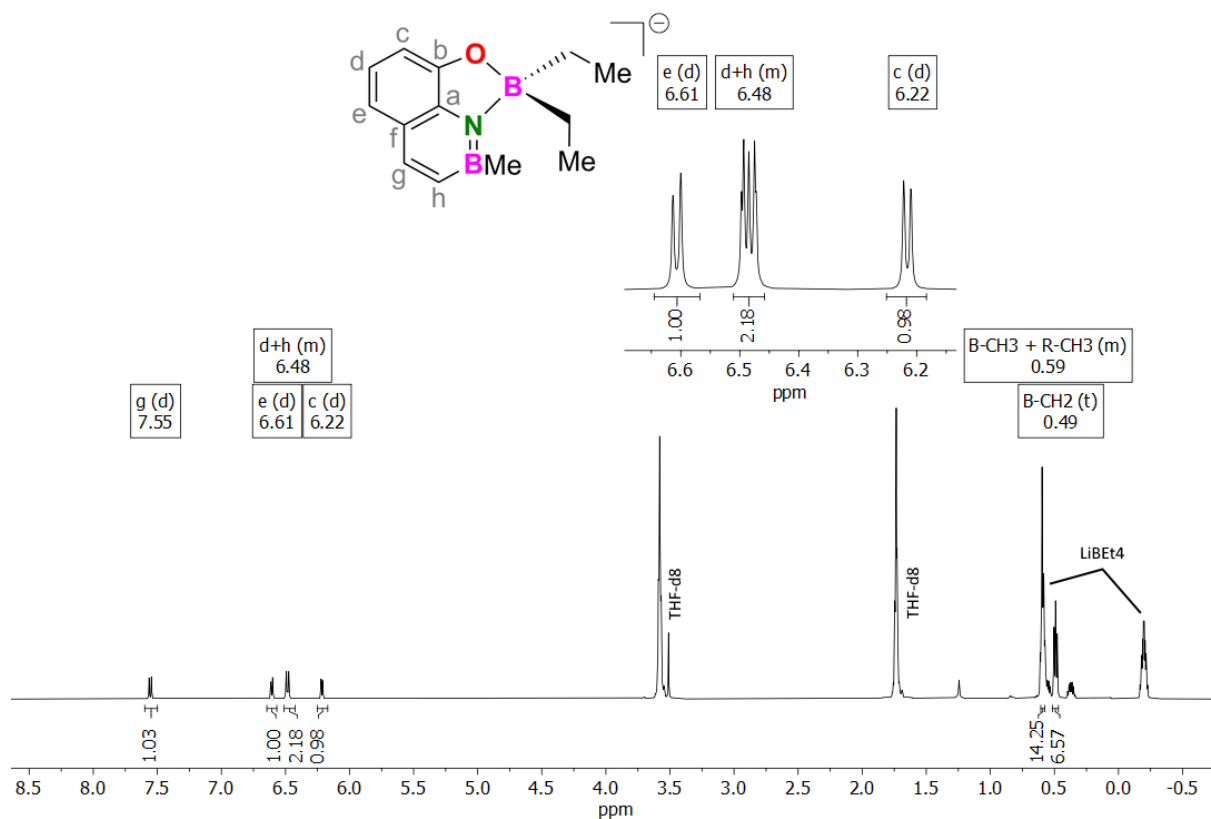

<sup>13</sup>C{<sup>1</sup>H} NMR (151 MHz, THF-d<sub>8</sub>)

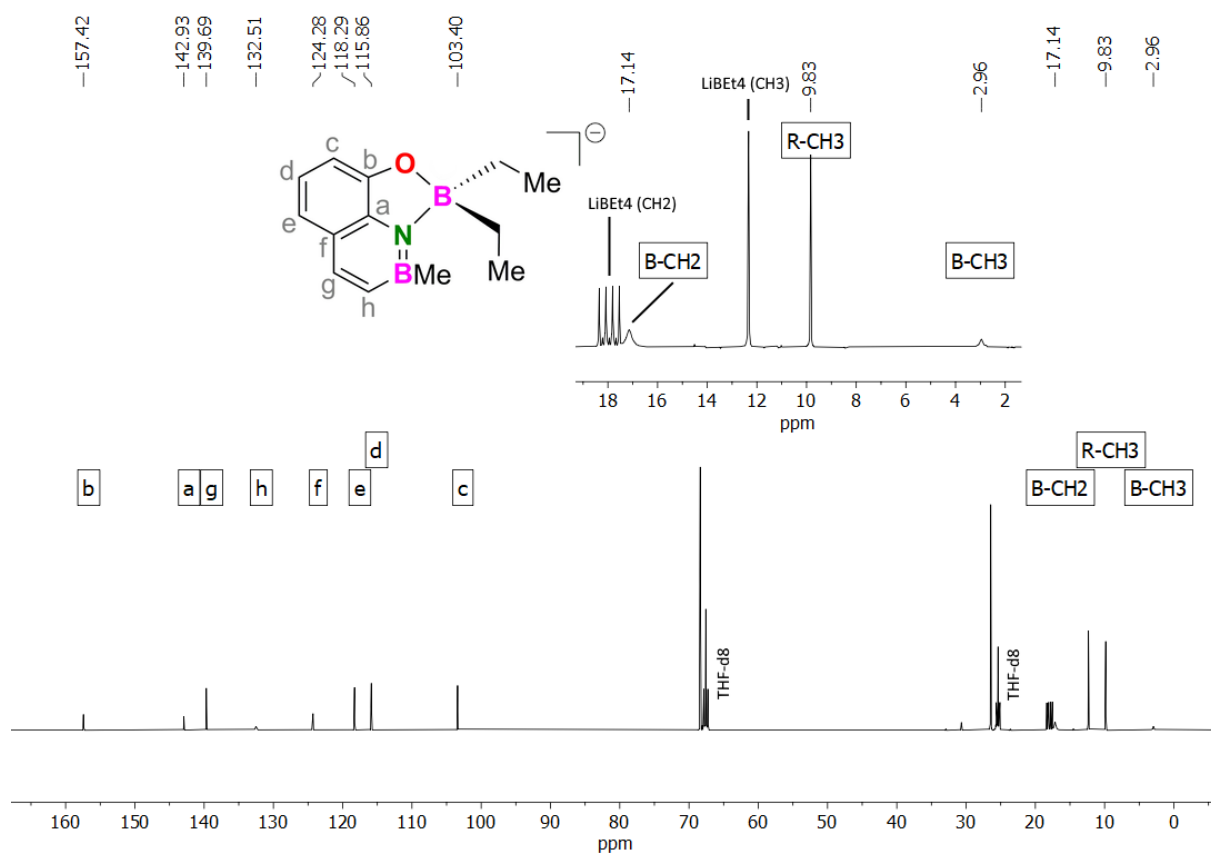

$^{11}\text{B}\{^1\text{H}\}$  NMR (193 MHz,  $\text{THF-}d_8$ )

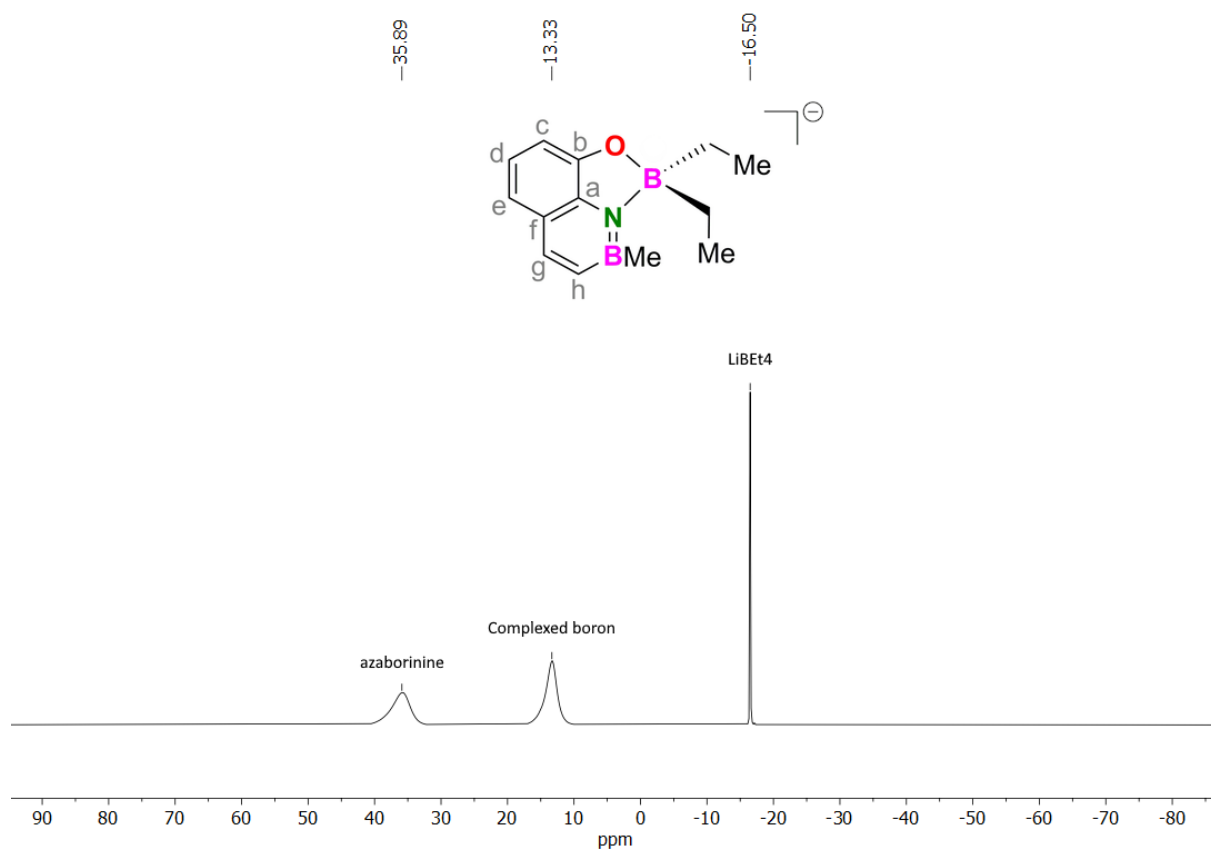

### 3.5. $\text{Li}[\text{Ph}_2\text{B}(\text{BQ})]$ (10)

$^1\text{H}$  NMR (601 MHz,  $\text{THF-}d_8$ )

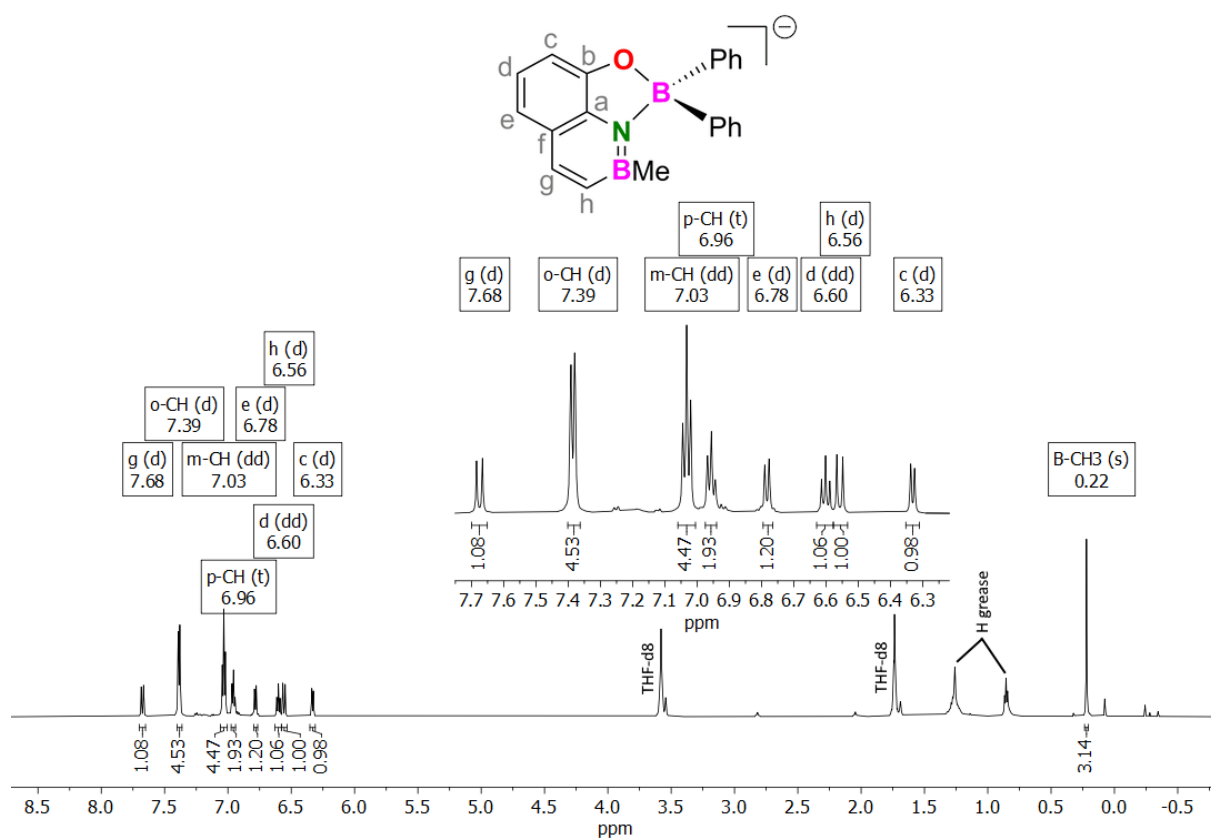

$^{13}\text{C}\{^1\text{H}\}$  NMR (151 MHz, THF- $d_8$ )

~155.84  
~153.01  
~141.94  
~140.29  
~134.89  
~133.57  
~127.09  
~125.66  
~124.62  
~118.90  
~117.00  
-104.57

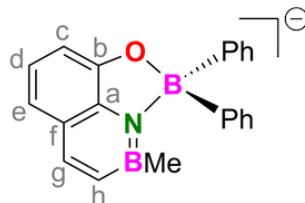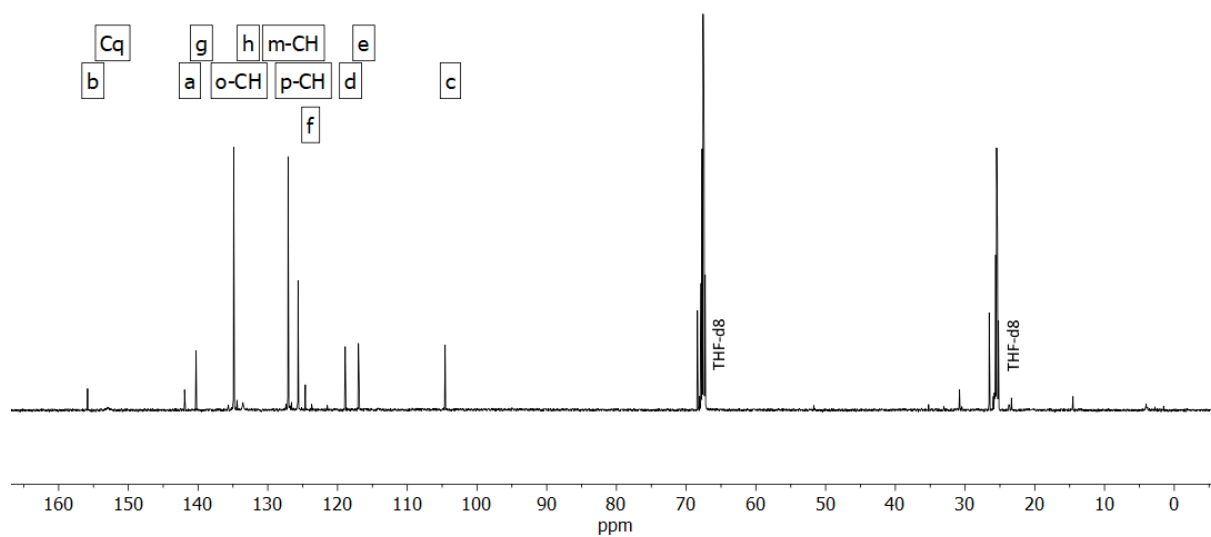

$^{11}\text{B}\{^1\text{H}\}$  NMR (193 MHz, THF- $d_8$ )

-37.31  
-10.52  
-11.40

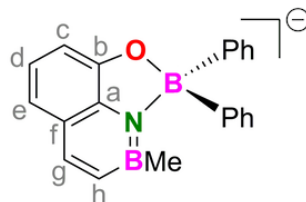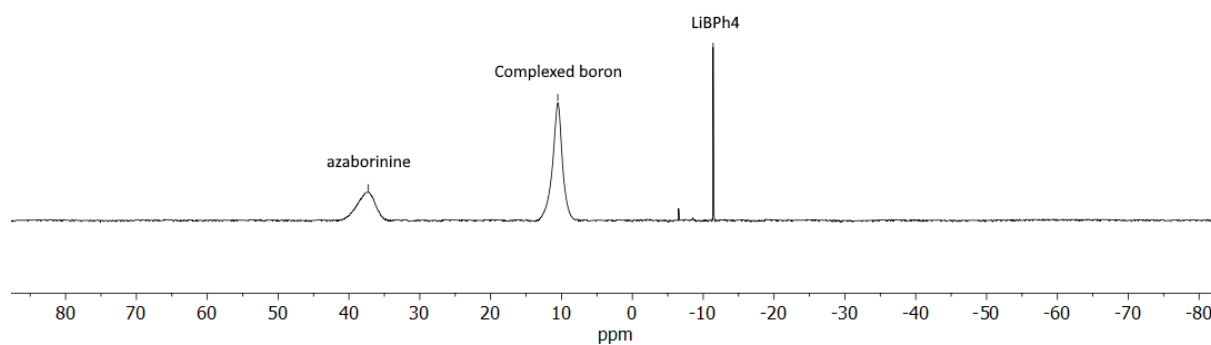

### 3.6. Na[B(BQ)<sub>2</sub>] (11)

<sup>1</sup>H NMR (601 MHz, THF-*d*<sub>8</sub>)

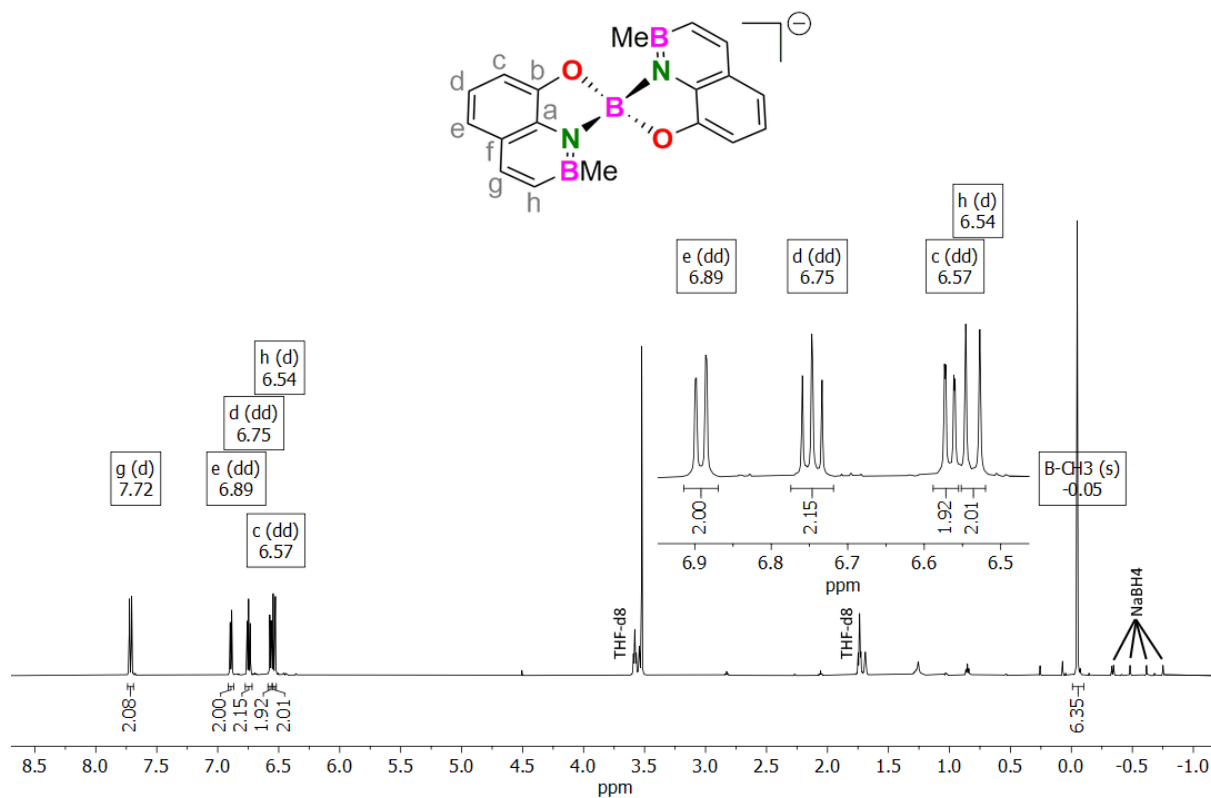

<sup>13</sup>C{<sup>1</sup>H} NMR (151 MHz, THF-*d*<sub>8</sub>)

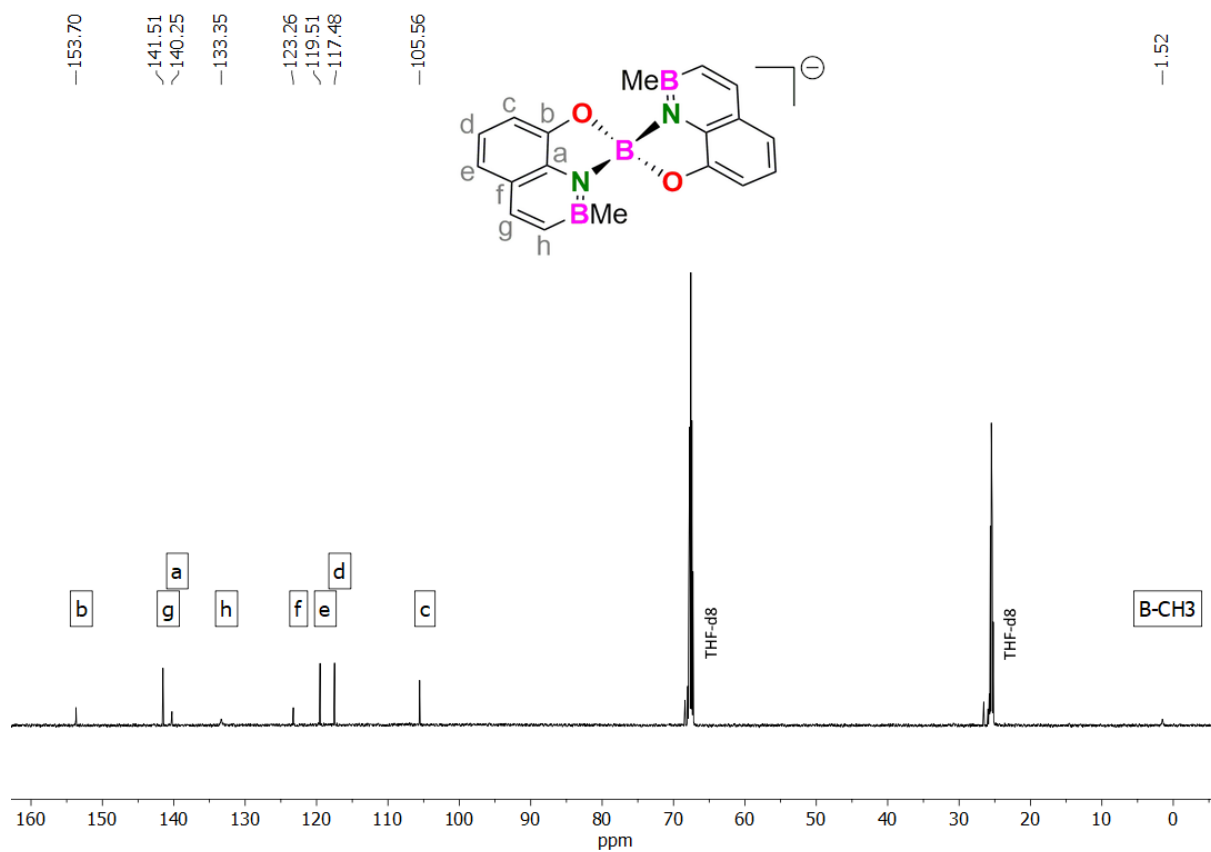



$^{11}\text{B}\{^1\text{H}\}$  NMR (193 MHz,  $\text{THF}-d_8$ )

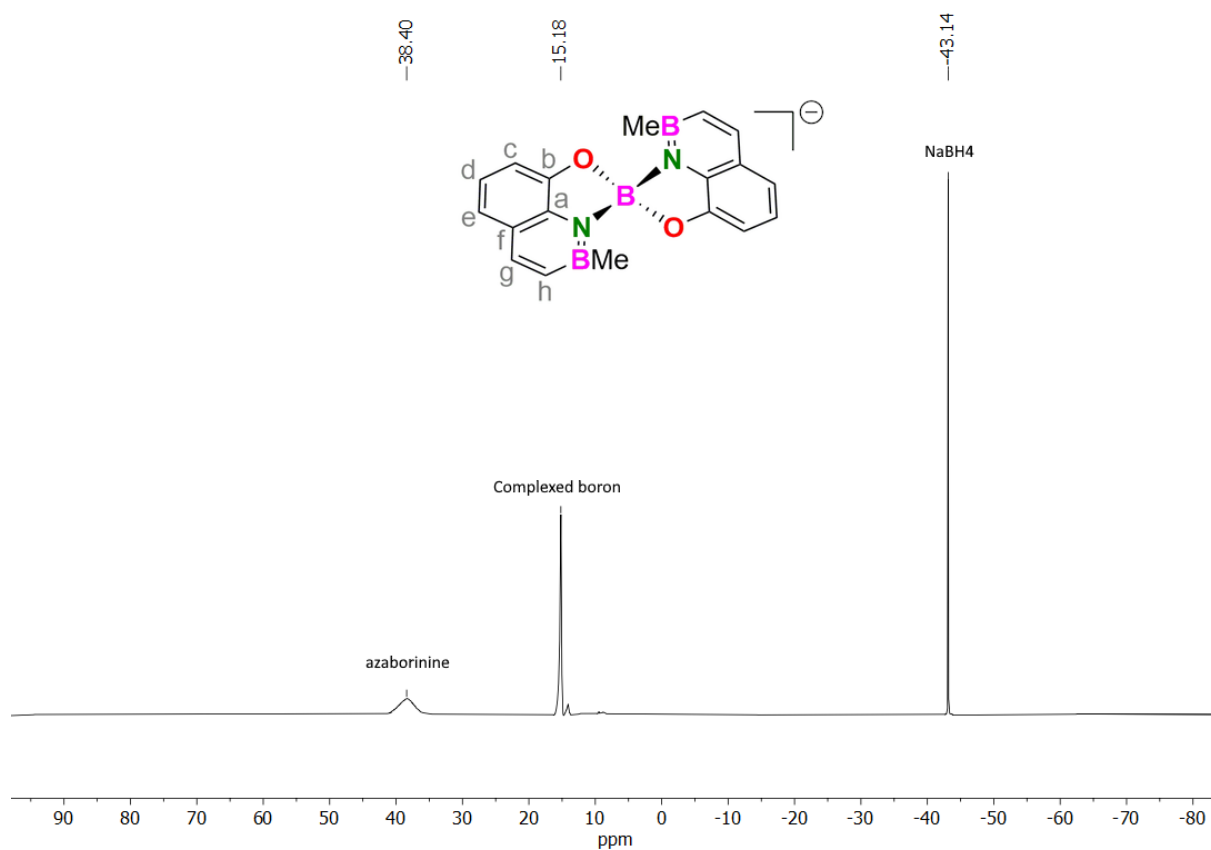

### 3.7. $\text{Li}[\text{Me}_2\text{Al}(\text{BQ})]$ (4)

$^1\text{H}$  NMR (601 MHz,  $\text{THF}-d_8$ )

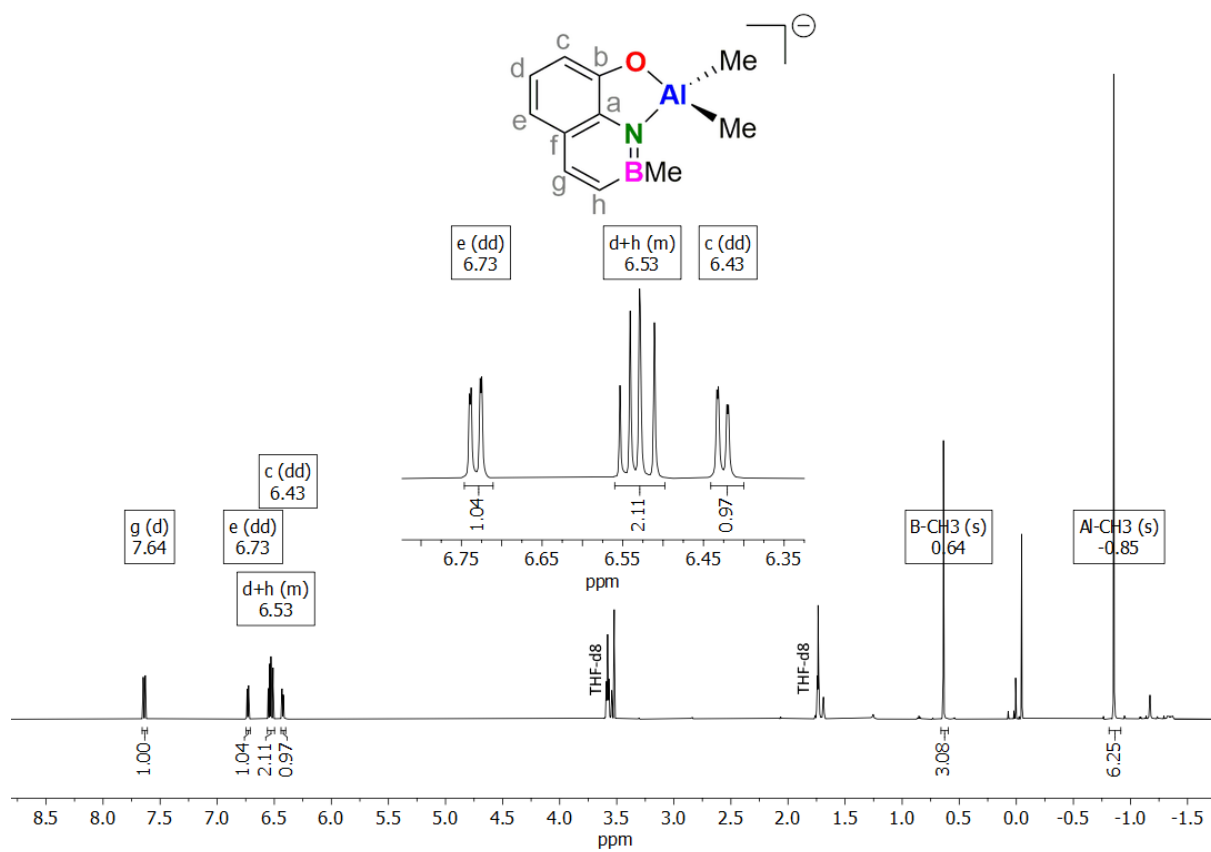

$^{13}\text{C}\{^1\text{H}\}$  NMR (151 MHz, THF- $d_8$ )

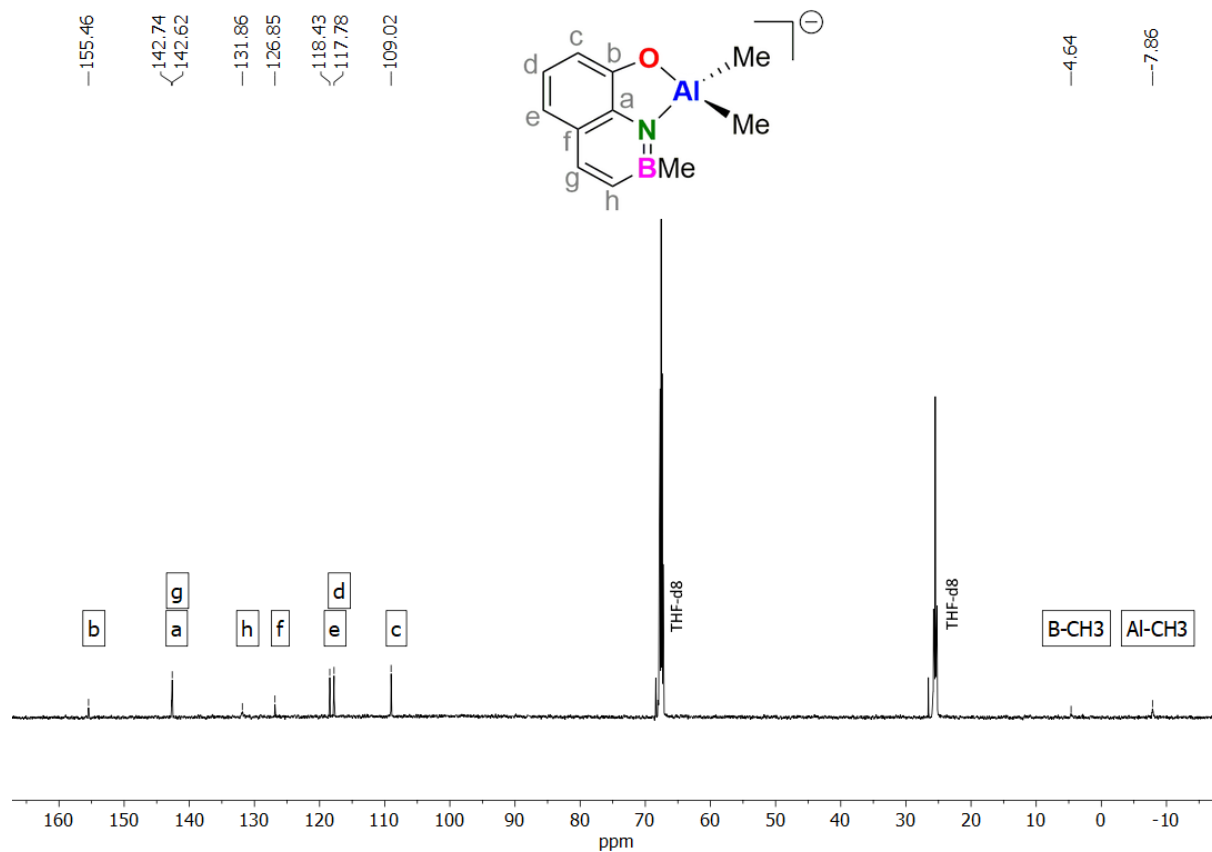

$^{11}\text{B}\{^1\text{H}\}$  NMR (193 MHz, THF- $d_8$ )

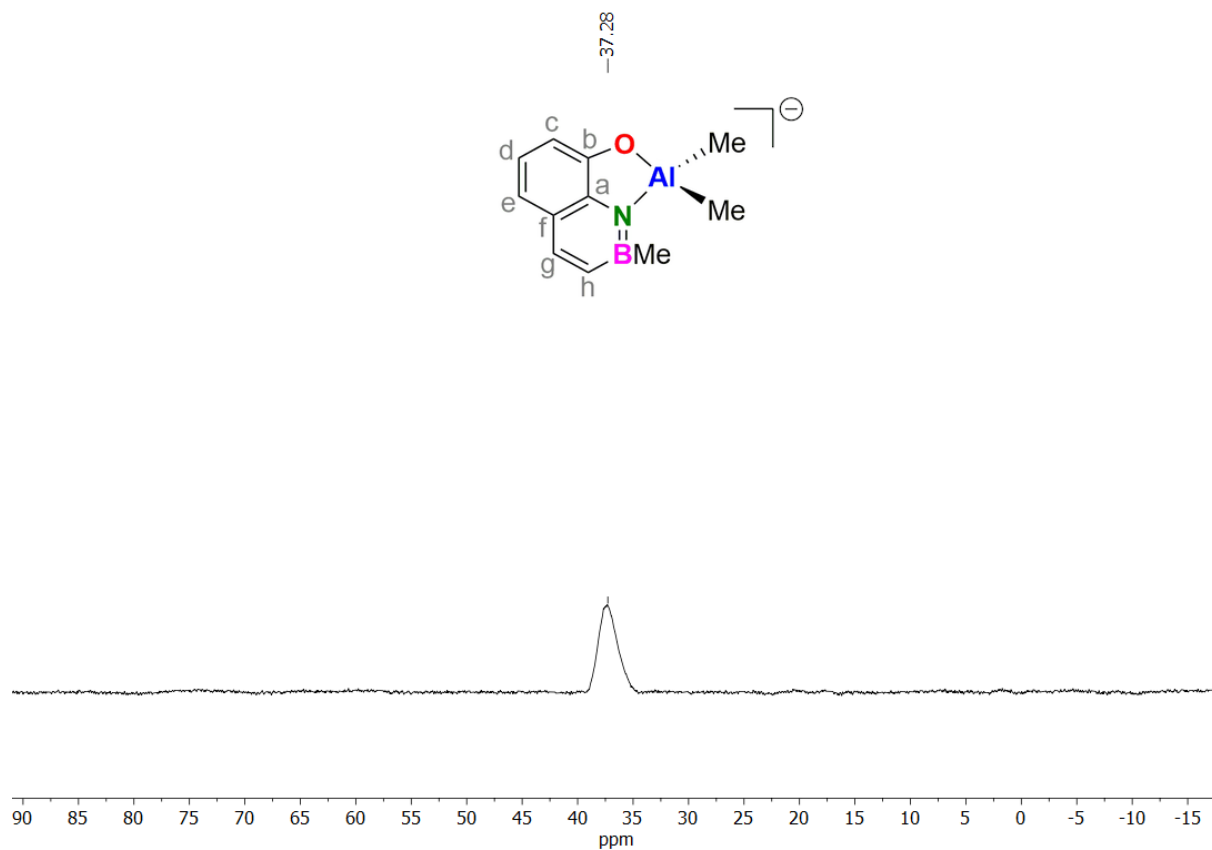

### 3.8. Li[Ph<sub>2</sub>Al(BQ)] (12)

<sup>1</sup>H NMR (601 MHz, THF-d<sub>8</sub>)

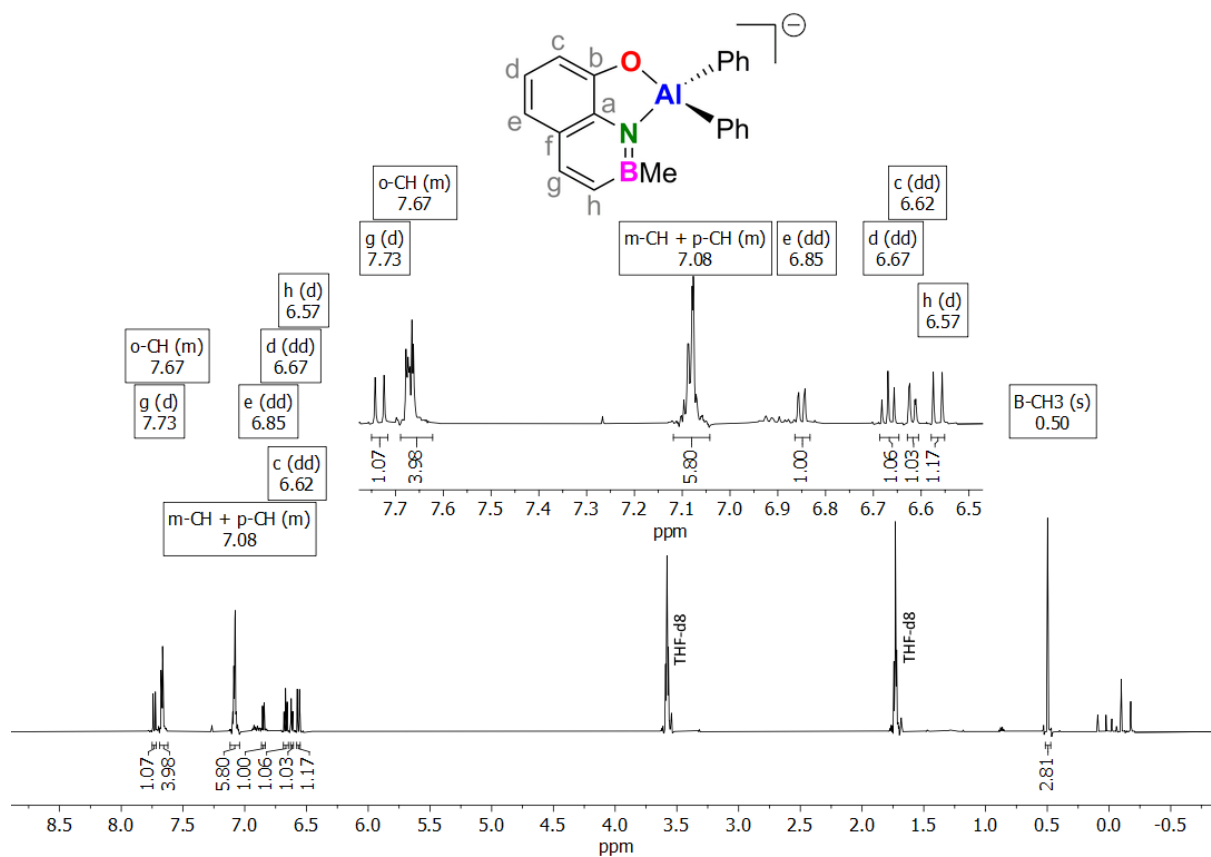

<sup>13</sup>C{<sup>1</sup>H} NMR (151 MHz, THF-d<sub>8</sub>)

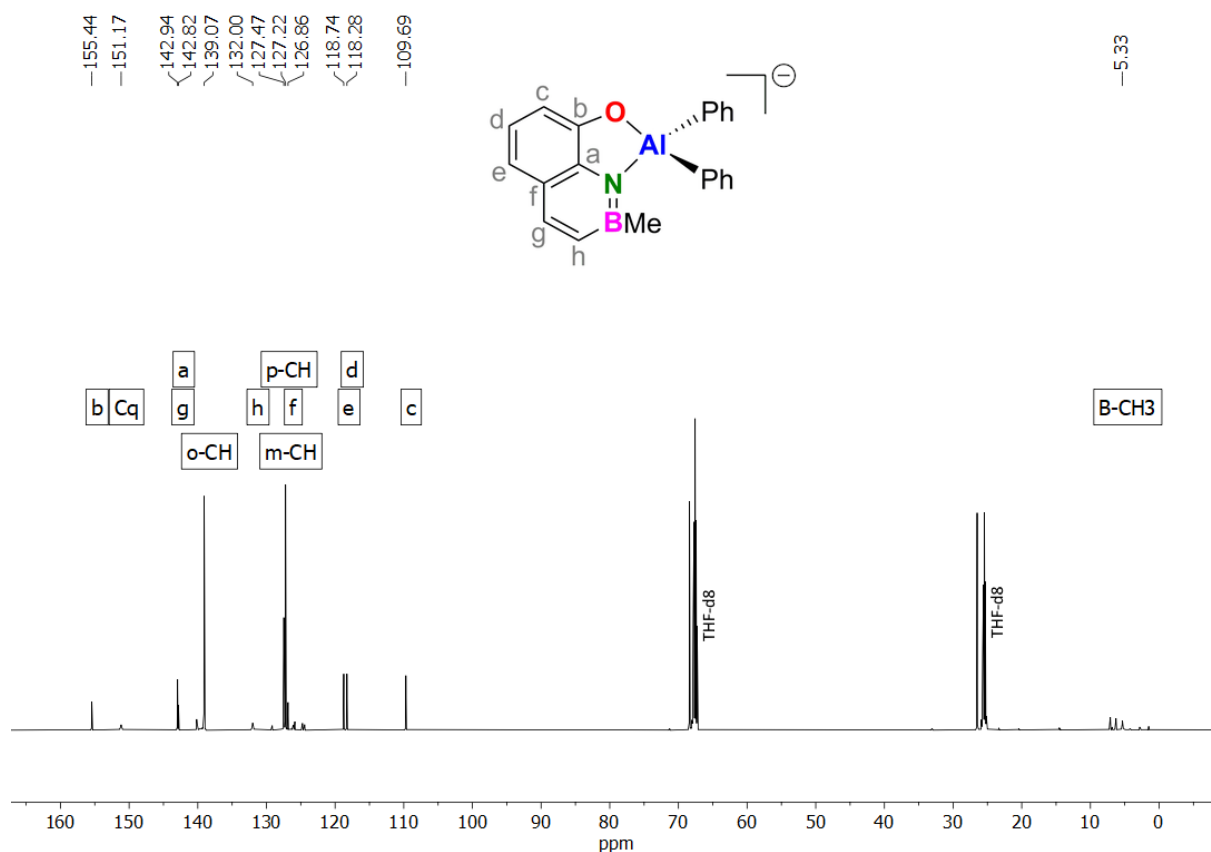

$^{11}\text{B}\{^1\text{H}\}$  NMR (193 MHz, THF- $d_8$ )

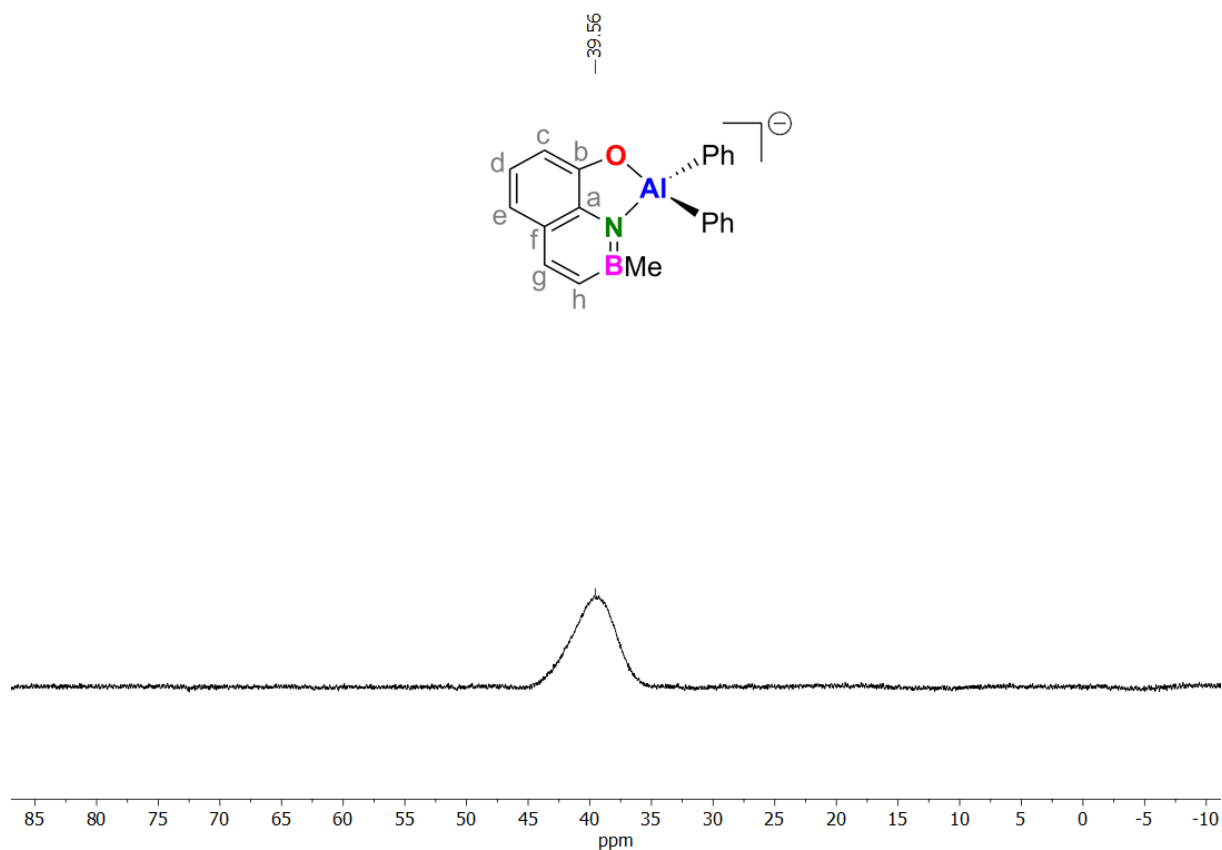

### 3.9. $\text{Li}[\text{Al}(\text{BQ})_2]$ (13)

$^1\text{H}$  NMR (601 MHz, THF- $d_8$ )

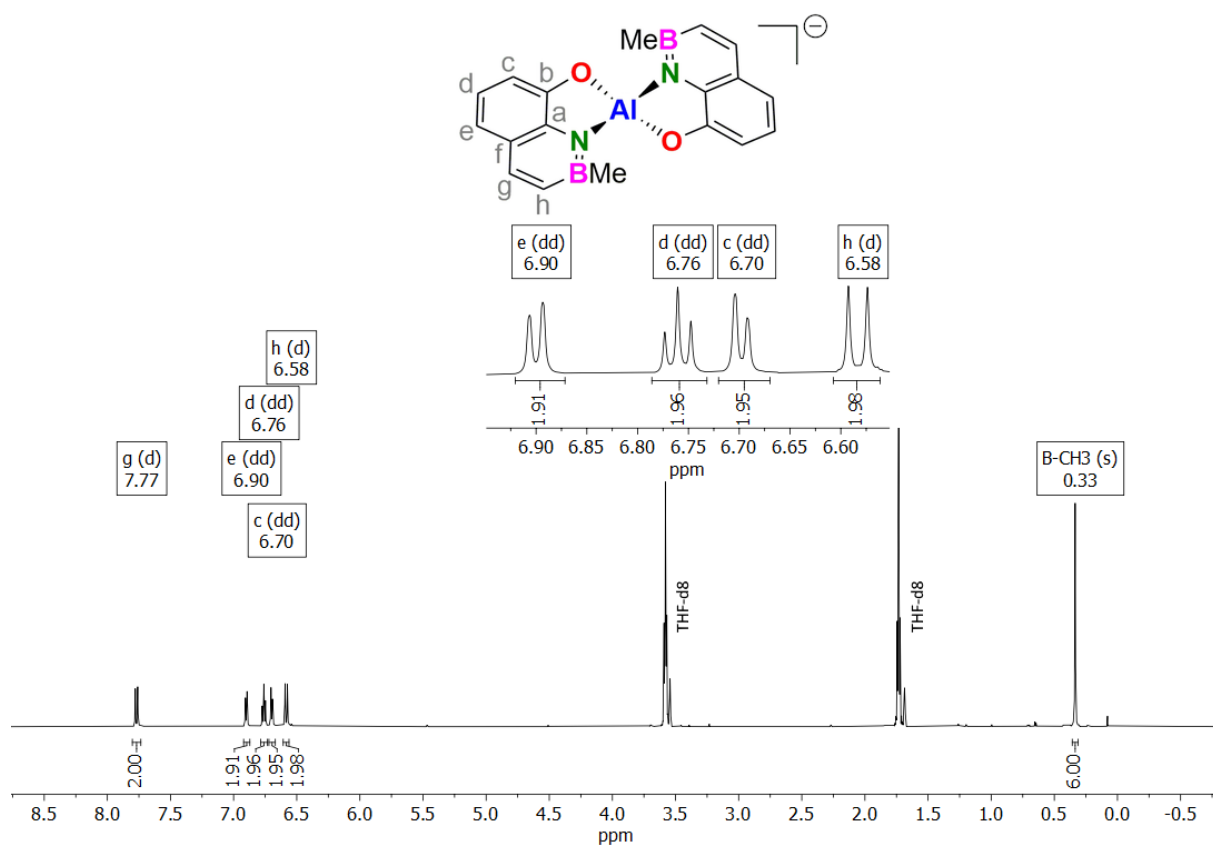

$^{13}\text{C}\{^1\text{H}\}$  NMR (151 MHz, THF- $d_8$ )

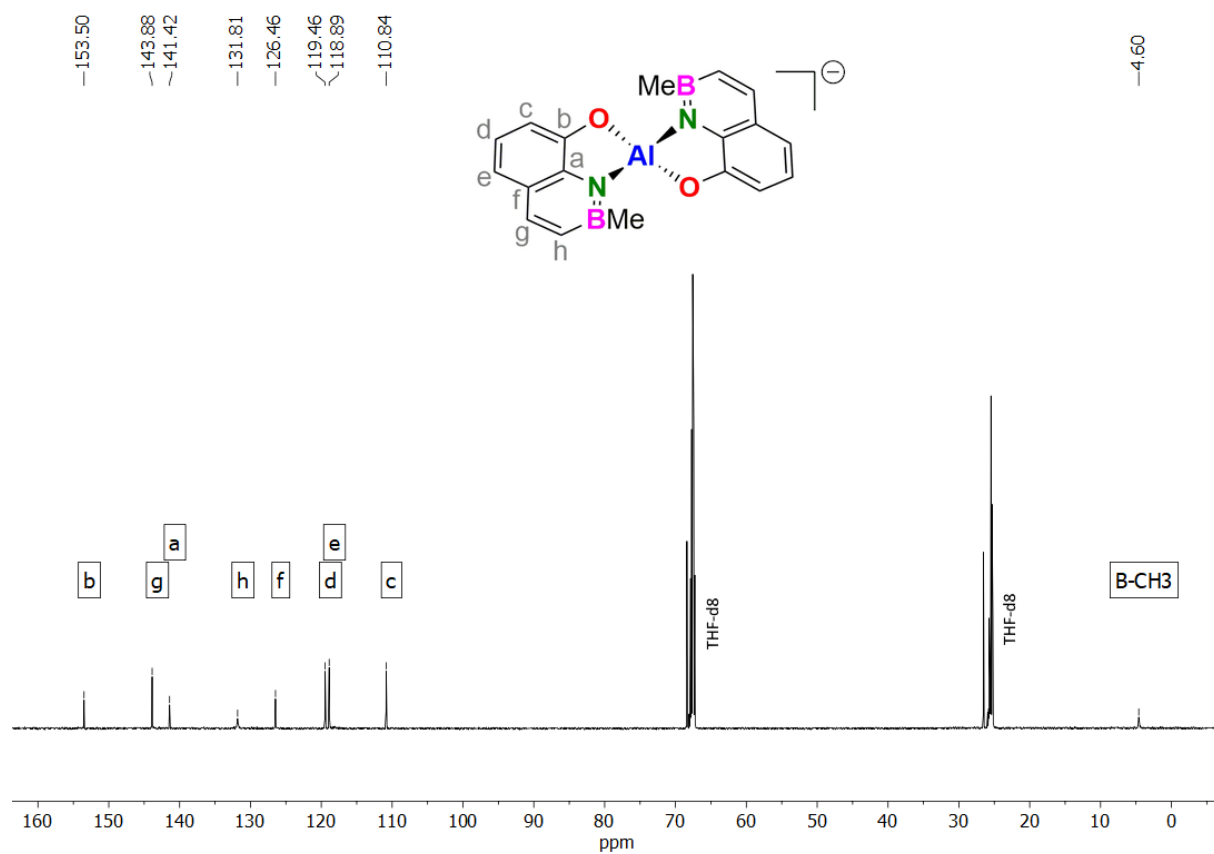

$^{11}\text{B}\{^1\text{H}\}$  NMR (193 MHz, THF- $d_8$ )

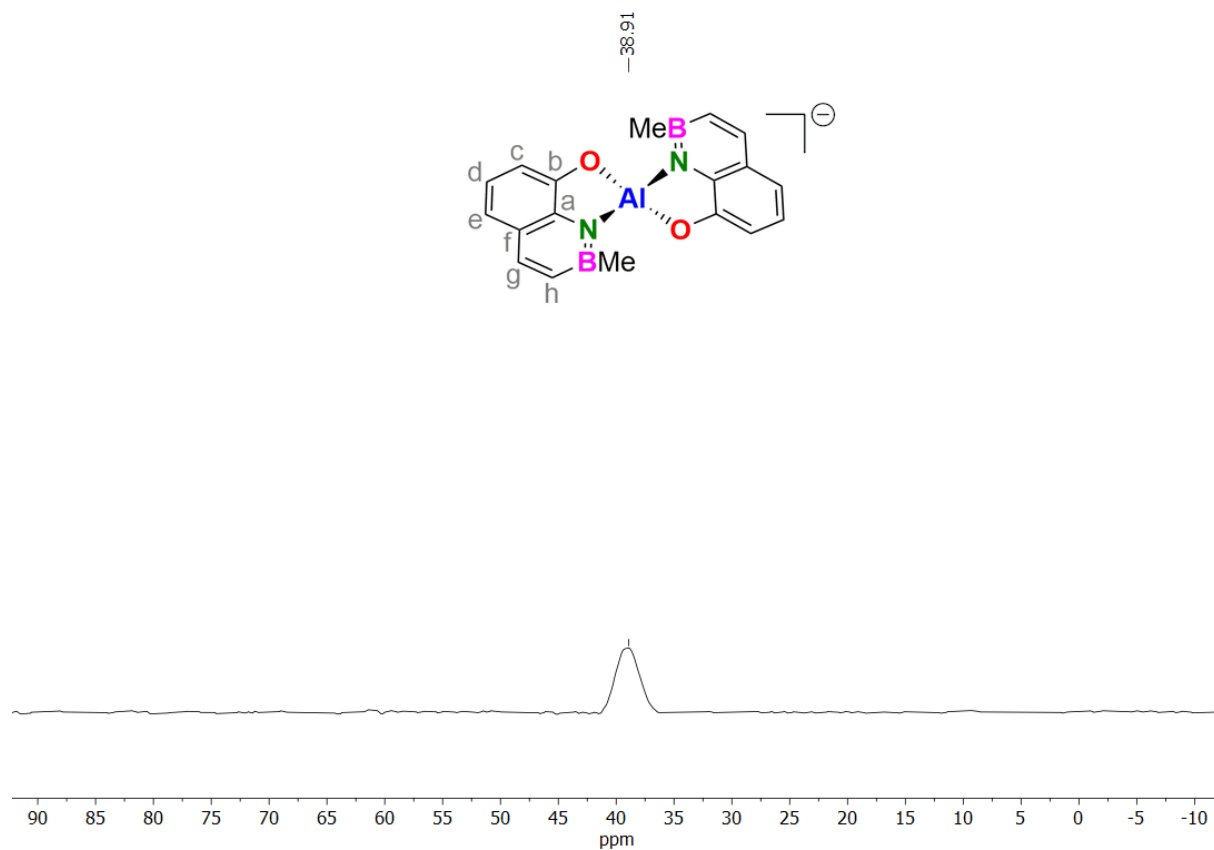

### 3.10. $[\text{Me}_2\text{Al}(\text{Q}')_2]_2$ (3)

$^1\text{H}$  NMR (601 MHz,  $\text{CDCl}_3$ )

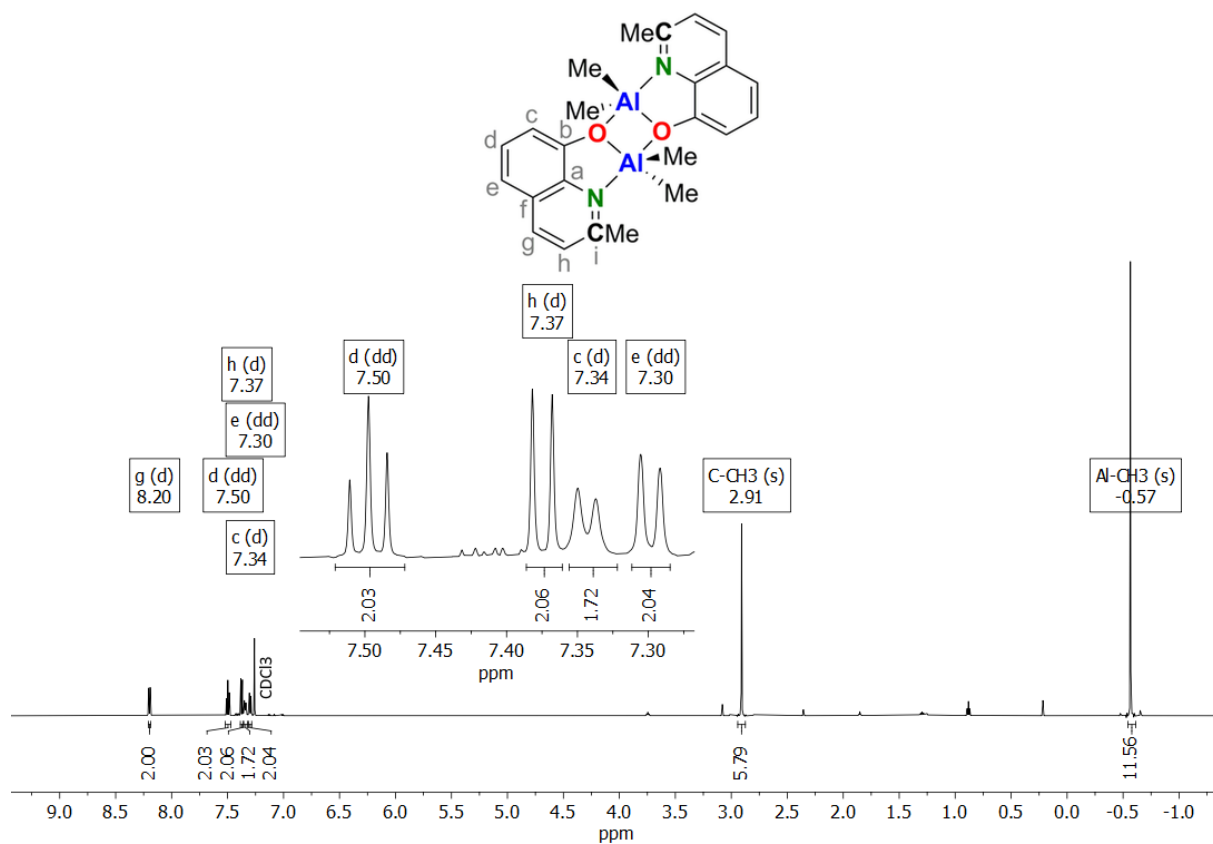

$^{13}\text{C}\{^1\text{H}\}$  NMR (151 MHz,  $\text{CDCl}_3$ )

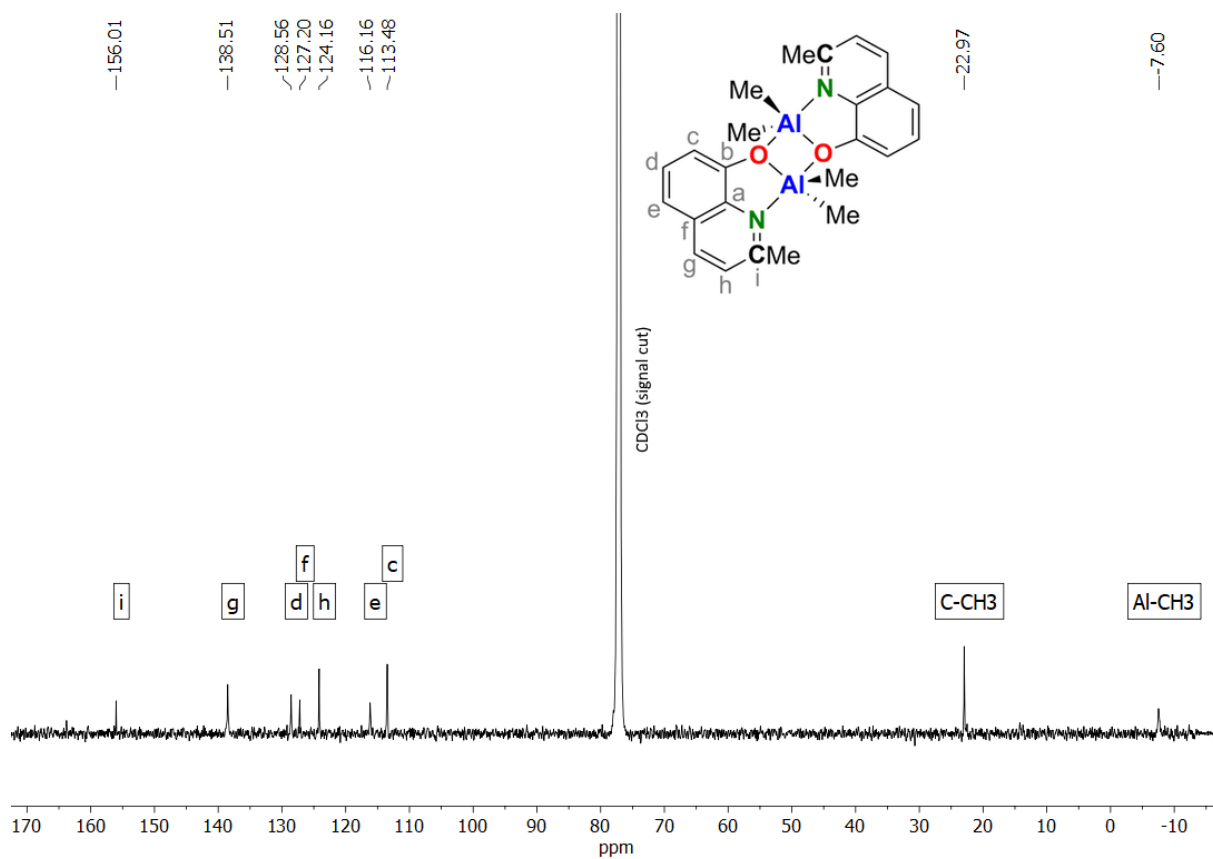

## 4. Optical Spectroscopy

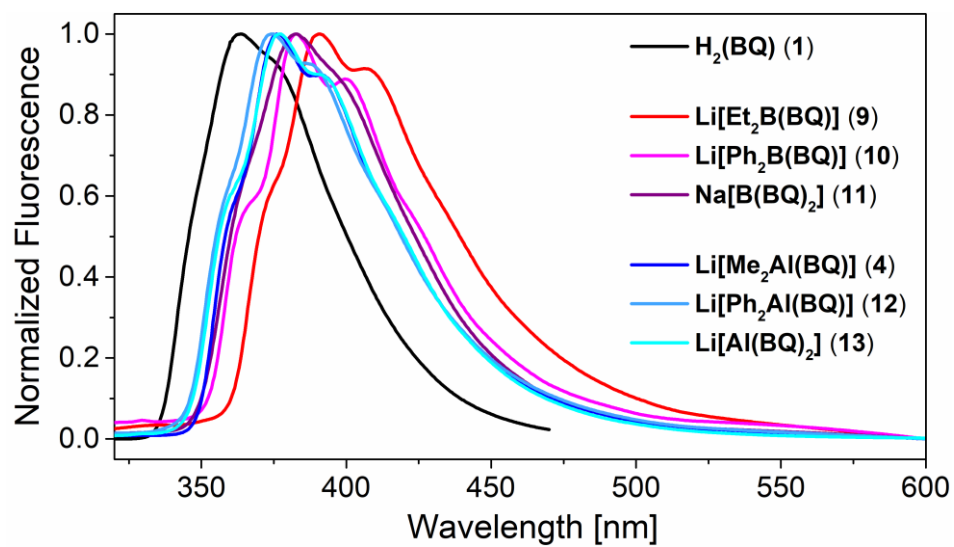

**Figure S2.** Fluorescence emission spectra of  $\text{H}_2(\text{BQ})$  and its complexes with boron and aluminum in THF solutions.

## 5. Calculations

**Table S2.** Coordinates of the geometry-optimized structures.

| Li[Me <sub>2</sub> Al(BQ)] (4) |          |          |          |
|--------------------------------|----------|----------|----------|
| Energy: -522269.7252143        |          |          |          |
| Charge: 0                      |          |          |          |
| Multiplicity: 1                |          |          |          |
| Atom                           | X        | Y        | Z        |
| C                              | -1.06675 | 1.91504  | 0.21772  |
| C                              | -0.99552 | 0.54344  | 0.09050  |
| C                              | 0.10911  | 2.69059  | 0.25006  |
| C                              | 1.33397  | 2.06454  | 0.15145  |
| C                              | 1.42725  | 0.65494  | 0.02936  |
| C                              | 0.25117  | -0.11427 | -0.00601 |
| C                              | 0.37989  | -1.54478 | -0.14568 |
| C                              | 1.59351  | -2.14585 | -0.23802 |
| B                              | 2.87763  | -1.29312 | -0.18581 |
| N                              | 2.70147  | 0.11507  | -0.05258 |
| C                              | 4.33219  | -1.91965 | -0.27875 |
| O                              | 2.53198  | 2.74102  | 0.14218  |
| Al                             | 3.97758  | 1.50839  | 0.16077  |
| C                              | 5.18026  | 1.54468  | 1.70561  |
| C                              | 4.85001  | 2.16025  | -1.58118 |
| H                              | -2.03637 | 2.40918  | 0.29810  |
| H                              | -1.90825 | -0.05595 | 0.06467  |
| H                              | 0.06661  | 3.77543  | 0.36632  |
| H                              | -0.55129 | -2.12227 | -0.17455 |
| H                              | 1.61624  | -3.23562 | -0.34342 |
| H                              | 4.49931  | -2.65286 | 0.52922  |
| H                              | 5.15204  | -1.18330 | -0.22013 |
| H                              | 4.46242  | -2.47811 | -1.22211 |
| H                              | 5.67077  | 2.52608  | 1.82550  |
| H                              | 5.98392  | 0.79354  | 1.62053  |
| H                              | 4.26477  | 2.06285  | -2.52348 |
| H                              | 5.71507  | 1.50041  | -1.74960 |
| H                              | 5.30246  | 3.17677  | -1.56379 |
| H                              | 4.63932  | 1.33277  | 2.64244  |
| Li                             | 3.15786  | 3.40831  | -1.38667 |

| [Me <sub>2</sub> Al(BQ)] <sup>-</sup> (14) |          |          |          |
|--------------------------------------------|----------|----------|----------|
| Energy: -517571.4593898                    |          |          |          |
| Charge: -1                                 |          |          |          |
| Multiplicity: 1                            |          |          |          |
| Atom                                       | X        | Y        | Z        |
| C                                          | -1.01759 | 1.95972  | 0.20629  |
| C                                          | -0.98565 | 0.58557  | 0.11585  |
| C                                          | 0.17444  | 2.71533  | 0.20830  |
| C                                          | 1.40470  | 2.08214  | 0.11909  |
| C                                          | 1.44688  | 0.65170  | 0.02116  |
| C                                          | 0.25543  | -0.09582 | 0.02095  |
| C                                          | 0.36098  | -1.52628 | -0.07923 |
| C                                          | 1.56601  | -2.15275 | -0.17203 |
| B                                          | 2.85854  | -1.31213 | -0.17307 |
| N                                          | 2.70465  | 0.09456  | -0.07226 |
| C                                          | 4.30655  | -1.97309 | -0.27419 |
| O                                          | 2.57311  | 2.71995  | 0.11561  |
| Al                                         | 3.99728  | 1.55794  | -0.05256 |
| C                                          | 5.18489  | 1.58083  | 1.54582  |
| C                                          | 4.95045  | 1.79271  | -1.78571 |
| H                                          | -1.97743 | 2.47902  | 0.27799  |
| H                                          | -1.91066 | 0.00228  | 0.11459  |
| H                                          | 0.15374  | 3.80465  | 0.28021  |
| H                                          | -0.58136 | -2.09072 | -0.07856 |
| H                                          | 1.56745  | -3.24752 | -0.24657 |
| H                                          | 4.37788  | -2.66303 | -1.13430 |
| H                                          | 4.52418  | -2.58310 | 0.62193  |
| H                                          | 5.12081  | -1.23690 | -0.37149 |
| H                                          | 5.73156  | 2.53779  | 1.63667  |
| H                                          | 5.95005  | 0.78402  | 1.50149  |
| H                                          | 5.75117  | 1.04346  | -1.92662 |
| H                                          | 5.43163  | 2.78545  | -1.86197 |
| H                                          | 4.26468  | 1.69856  | -2.64607 |
| H                                          | 4.62351  | 1.43841  | 2.48569  |



| [Me <sub>2</sub> Al(Q')] <sub>2</sub> (3) |          |          |          |
|-------------------------------------------|----------|----------|----------|
| Energy: -1051651.7114221                  |          |          |          |
| Charge: 0                                 |          |          |          |
| Multiplicity: 1                           |          |          |          |
| Atom                                      | X        | Y        | Z        |
| C                                         | -3.87082 | -2.69737 | 0.10197  |
| C                                         | -3.89183 | -4.09400 | -0.12682 |
| C                                         | -2.72043 | -4.76357 | -0.36051 |
| N                                         | -1.44386 | -2.75844 | -0.18114 |
| C                                         | -2.60224 | -2.08044 | 0.05885  |
| C                                         | -2.46676 | -0.67905 | 0.28078  |
| C                                         | -3.59505 | 0.06851  | 0.54080  |
| C                                         | -4.86358 | -0.55545 | 0.58040  |
| C                                         | -5.01510 | -1.90324 | 0.36706  |
| Al                                        | 0.26332  | -1.34141 | -0.14443 |
| O                                         | -1.22182 | -0.19440 | 0.22503  |
| C                                         | 3.64564  | 3.08225  | 0.01166  |
| C                                         | 3.65277  | 4.49492  | 0.10216  |
| C                                         | 2.47341  | 5.17313  | 0.25619  |
| N                                         | 1.21235  | 3.15029  | 0.23140  |
| C                                         | 2.38002  | 2.46204  | 0.08328  |
| C                                         | 2.25904  | 1.04382  | 0.01162  |
| C                                         | 3.39966  | 0.28243  | -0.12723 |
| C                                         | 4.66471  | 0.91016  | -0.20064 |
| C                                         | 4.80163  | 2.27475  | -0.13514 |
| Al                                        | -0.48812 | 1.72258  | 0.28423  |
| O                                         | 1.01619  | 0.55669  | 0.09323  |
| C                                         | -1.48486 | -4.06546 | -0.37639 |
| C                                         | 0.72469  | -1.49298 | -2.06465 |
| C                                         | 1.17771  | -2.20054 | 1.39181  |
| C                                         | -1.08888 | 2.17289  | 2.12247  |
| C                                         | -1.30714 | 2.34077  | -1.40723 |
| C                                         | 1.24273  | 4.46882  | 0.31992  |
| H                                         | -2.71787 | -5.83975 | -0.53551 |
| H                                         | -3.50217 | 1.13859  | 0.72127  |
| H                                         | -5.74014 | 0.06032  | 0.78934  |
| H                                         | -5.99866 | -2.37380 | 0.40101  |
| H                                         | 2.46074  | 6.26056  | 0.33539  |
| H                                         | 3.32017  | -0.80272 | -0.17382 |
| H                                         | 5.55119  | 0.28309  | -0.31080 |
| H                                         | 5.78313  | 2.74750  | -0.19125 |
| H                                         | 0.06285  | -0.82629 | -2.64646 |
| H                                         | 0.61561  | -2.49825 | -2.50369 |
| H                                         | 1.75590  | -1.16131 | -2.27492 |
| H                                         | 1.84054  | -1.49996 | 1.92626  |
| H                                         | 1.80034  | -3.06269 | 1.09351  |
| H                                         | 0.45225  | -2.57899 | 2.13331  |
| H                                         | -1.96116 | 2.85227  | 2.13388  |
| H                                         | -0.30198 | 2.66121  | 2.72255  |
| H                                         | -1.39468 | 1.26796  | 2.67395  |
| H                                         | -0.63667 | 2.12444  | -2.25823 |
| H                                         | -1.51124 | 3.42435  | -1.43501 |
| H                                         | -2.26066 | 1.83025  | -1.62405 |
| H                                         | -4.84522 | -4.62674 | -0.11326 |
| C                                         | -0.04807 | 5.21788  | 0.47280  |
| C                                         | -0.19854 | -4.81013 | -0.57966 |
| H                                         | 4.60269  | 5.03187  | 0.05442  |
| H                                         | -0.37295 | -5.76153 | -1.09934 |

| [Me <sub>2</sub> Al(Q')] <sub>2</sub> (15) |          |          |          |
|--------------------------------------------|----------|----------|----------|
| Energy: -525816.2632290                    |          |          |          |
| Charge: 0                                  |          |          |          |
| Multiplicity: 1                            |          |          |          |
| Atom                                       | X        | Y        | Z        |
| C                                          | -0.98862 | 1.91709  | 0.20545  |
| C                                          | -0.96980 | 0.54259  | 0.13878  |
| C                                          | 0.19122  | 2.69238  | 0.17253  |
| C                                          | 1.42943  | 2.08139  | 0.07173  |
| C                                          | 1.45667  | 0.65034  | 0.00435  |
| C                                          | 0.27673  | -0.12313 | 0.03420  |
| C                                          | 0.45265  | -1.52456 | -0.04856 |
| C                                          | 1.71277  | -2.06070 | -0.15065 |
| C                                          | 2.84824  | -1.21809 | -0.17052 |
| N                                          | 2.70229  | 0.09680  | -0.09382 |
| C                                          | 4.23975  | -1.76926 | -0.26676 |
| O                                          | 2.58680  | 2.71259  | 0.03165  |
| Al                                         | 4.07082  | 1.63321  | -0.07904 |
| C                                          | 5.09479  | 1.54591  | 1.59832  |
| C                                          | 4.95443  | 1.70880  | -1.83509 |
| H                                          | -1.94683 | 2.43446  | 0.28641  |
| H                                          | -1.89205 | -0.03880 | 0.16405  |
| H                                          | 0.14723  | 3.78030  | 0.22580  |
| H                                          | -0.42411 | -2.17597 | -0.03288 |
| H                                          | 1.85650  | -3.13906 | -0.21784 |
| H                                          | 4.22809  | -2.84834 | -0.46425 |
| H                                          | 4.78671  | -1.59463 | 0.67275  |
| H                                          | 4.79939  | -1.26923 | -1.07069 |
| H                                          | 4.45732  | 1.30882  | 2.46663  |
| H                                          | 5.57618  | 2.51583  | 1.81328  |
| H                                          | 5.90591  | 0.79776  | 1.56660  |
| H                                          | 4.25658  | 1.49985  | -2.66331 |
| H                                          | 5.80137  | 1.00695  | -1.92632 |
| H                                          | 5.36819  | 2.71644  | -2.01546 |

|   |          |          |          |
|---|----------|----------|----------|
| H | 0.26308  | -5.03259 | 0.39513  |
| H | 0.51741  | -4.21091 | -1.15428 |
| H | -0.77526 | 4.63327  | 1.04821  |
| H | -0.48804 | 5.42243  | -0.51587 |
| H | 0.11704  | 6.18110  | 0.97406  |

## 6. References

1. Mohammadnezhad, G.; Amini, M.M.; Khavasi, H.R.; Plass, W. Structural and spectroscopic characterizations of aluminum phenoxide. *Spectrochimica Acta Part A: Molecular and Biomolecular Spectroscopy* **2016**, *157*, 238-243, doi:<https://doi.org/10.1016/j.saa.2016.01.009>.
